# Supplementary material
Source: PubMed Central journal article supplement (PMC3151009)

## Total Synthesis of (–)-Nakadomarin A

Mark G. Nilson and Raymond L. Funk\*

*Department of Chemistry, Pennsylvania State University,  
University Park, PA 16802*

[rjf@chem.psu.edu](mailto:rjf@chem.psu.edu)

### Supporting Information: $^1\text{H}$ and $^{13}\text{C}$ Spectra

|                                                                                              |             |
|----------------------------------------------------------------------------------------------|-------------|
| $^1\text{H}$ and $^{13}\text{C}$ Spectra of New Compounds                                    | S-2 – S-35  |
| $^1\text{H}$ and $^{13}\text{C}$ Spectra of Synthetic Nakadomarin A                          | S-36 – S-37 |
| Comparison of $^1\text{H}$ Spectra: Synthetic Nakadomarin A by Nishida, Funk, Kerr and Dixon | S-38 – S-39 |

Hz

Integral

ppm

2904.87

2315.25

1496.80  
1492.92  
1487.01  
1483.12  
1420.44  
1412.44  
1410.68  
1402.67  
949.27  
947.55  
942.22  
939.28  
932.74  
931.30  
880.51  
872.72  
867.44  
447.72  
441.94  
439.10  
433.20  
428.59  
422.50  
420.04  
417.54  
414.83  
411.80

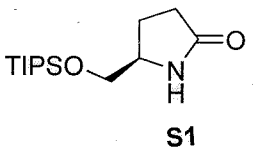

0.898

0.993  
1.013  
1.000

2.016  
1.019

1.014

25.588

Current Data Parameters  
NAME 071908mgn  
EXPNO 123208  
PROCNO 1

F2 - Acquisition Parameters  
Date\_ 20080719  
Time 16.30  
INSTRUM spect  
PROBHD 5 mm BBI 1H-B  
PULPROG zg30  
TD 65536  
SOLVENT CDC13  
NS 16  
DS 2  
SWH 8278.146 Hz  
FIDRES 0.126314 Hz  
AQ 3.9584243 sec  
RG 406.4  
DW 60.400 usec  
DE 6.00 usec  
TE 300.0 K  
D1 1.00000000 sec

===== CHANNEL f1 =====  
NUC1 1H  
P1 6.45 usec  
PL1 0.00 dB  
SF01 400.1324710 MHz

F2 - Processing parameters  
SI 32768  
SF 400.1300094 MHz  
WDW no  
SSB 0  
LB 0.00 Hz  
GB 0  
PC 1.00

1D NMR plot parameters  
CX 20.00 cm  
F1P 10.000 ppm  
F1 4001.30 Hz  
F2P -0.500 ppm  
F2 -200.07 Hz  
PPMCM 0.52500 ppm/cm  
HZCM 210.06825 Hz/cm

ppm

178.106

77.421

76.997

76.573

67.064

55.915

29.748

22.657

17.819

17.629

12.242

11.726

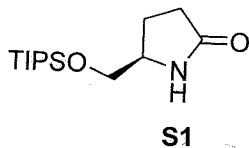

ppm

180

160

140

120

100

80

60

40

20

S-3

Current Data Parameters

NAME 071908mgn  
 EXPNO 123213  
 PROCNO 1

F2 - Acquisition Parameters

Date\_ 20080719  
 Time 17.47  
 INSTRUM spect  
 PROBHD 5 mm GNP 1H/1  
 PULPROG zgpg30  
 TD 65536  
 SOLVENT CDC13  
 NS 512  
 DS 4  
 SWH 18796.992 Hz  
 FIDRES 0.286819 Hz  
 AQ 1.7433076 sec  
 RG 512  
 DW 26.600 usec  
 DE 6.00 usec  
 TE 300.0 K  
 D1 2.00000000 sec  
 D11 0.03000000 sec  
 D12 0.00002000 sec

===== CHANNEL f1 =====

NUC1 13C  
 P1 5.40 usec  
 PL1 -6.00 dB  
 SF01 75.4106357 MHz

===== CHANNEL f2 =====

CPDPRG2 waltz16  
 NUC2 1H  
 PCPD2 115.00 usec  
 PL2 0.00 dB  
 PL12 20.00 dB  
 PL13 20.00 dB  
 SF02 299.8711995 MHz

F2 - Processing parameters

SI 32768  
 SF 75.4023798 MHz  
 WDW no  
 SSB 0  
 LB 0.00 Hz  
 GB 0  
 PC 1.40

1D NMR plot parameters

CX 20.00 cm  
 F1P 200.000 ppm  
 F1 15080.48 Hz  
 F2P 0.000 ppm  
 F2 0.00 Hz  
 PPMCM 10.00000 ppm/cm  
 HZCM 754.02380 Hz/cm

Hz

2178.96

1590.26  
 1258.62  
 1254.92  
 1211.69  
 1207.59  
 1201.53  
 1197.41  
 1140.82  
 1138.49  
 1130.73  
 1128.39  
 830.44  
 812.96  
 632.18  
 630.33  
 627.93  
 624.62  
 622.17  
 617.81  
 614.47  
 470.16  
 456.33  
 336.90  
 331.81  
 329.69  
 327.52  
 322.46  
 315.28  
 311.31  
 303.62

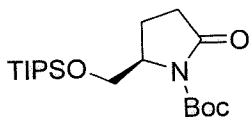

1.000  
 0.999  
 0.984  
 1.124  
 1.116  
 1.897  
 3.276  
 6.768  
 16.267

Current Data Parameters  
 NAME 070808mgn  
 EXPNO 12372  
 PROCNO 1

F2 - Acquisition Parameters  
 Date\_ 20080708  
 Time 16.49  
 INSTRUM spect  
 PROBHD 5 mm Multinu  
 PULPROG zg30  
 TD 24576  
 SOLVENT CDC13  
 NS 16  
 DS 2  
 SWH 6172.839 Hz  
 FIDRES 0.251173 Hz  
 AQ 1.9907060 sec  
 RG 645.1  
 DW 81.000 usec  
 DE 6.00 usec  
 TE 300.0 K  
 D1 1.00000000 sec

===== CHANNEL f1 =====  
 NUC1 1H  
 P1 9.60 usec  
 PL1 -6.00 dB  
 SF01 300.1318534 MHz

F2 - Processing parameters  
 SI 32768  
 SF 300.1300062 MHz  
 WDW no  
 SSB 0  
 LB 0.00 Hz  
 GB 0  
 PC 1.00

1D NMR plot parameters  
 CX 20.00 cm  
 F1P 10.000 ppm  
 F1 3001.30 Hz  
 F2P -0.500 ppm  
 F2 -150.07 Hz  
 PPMCM 0.52500 ppm/cm  
 HZCM 157.56825 Hz/cm

Integral

ppm

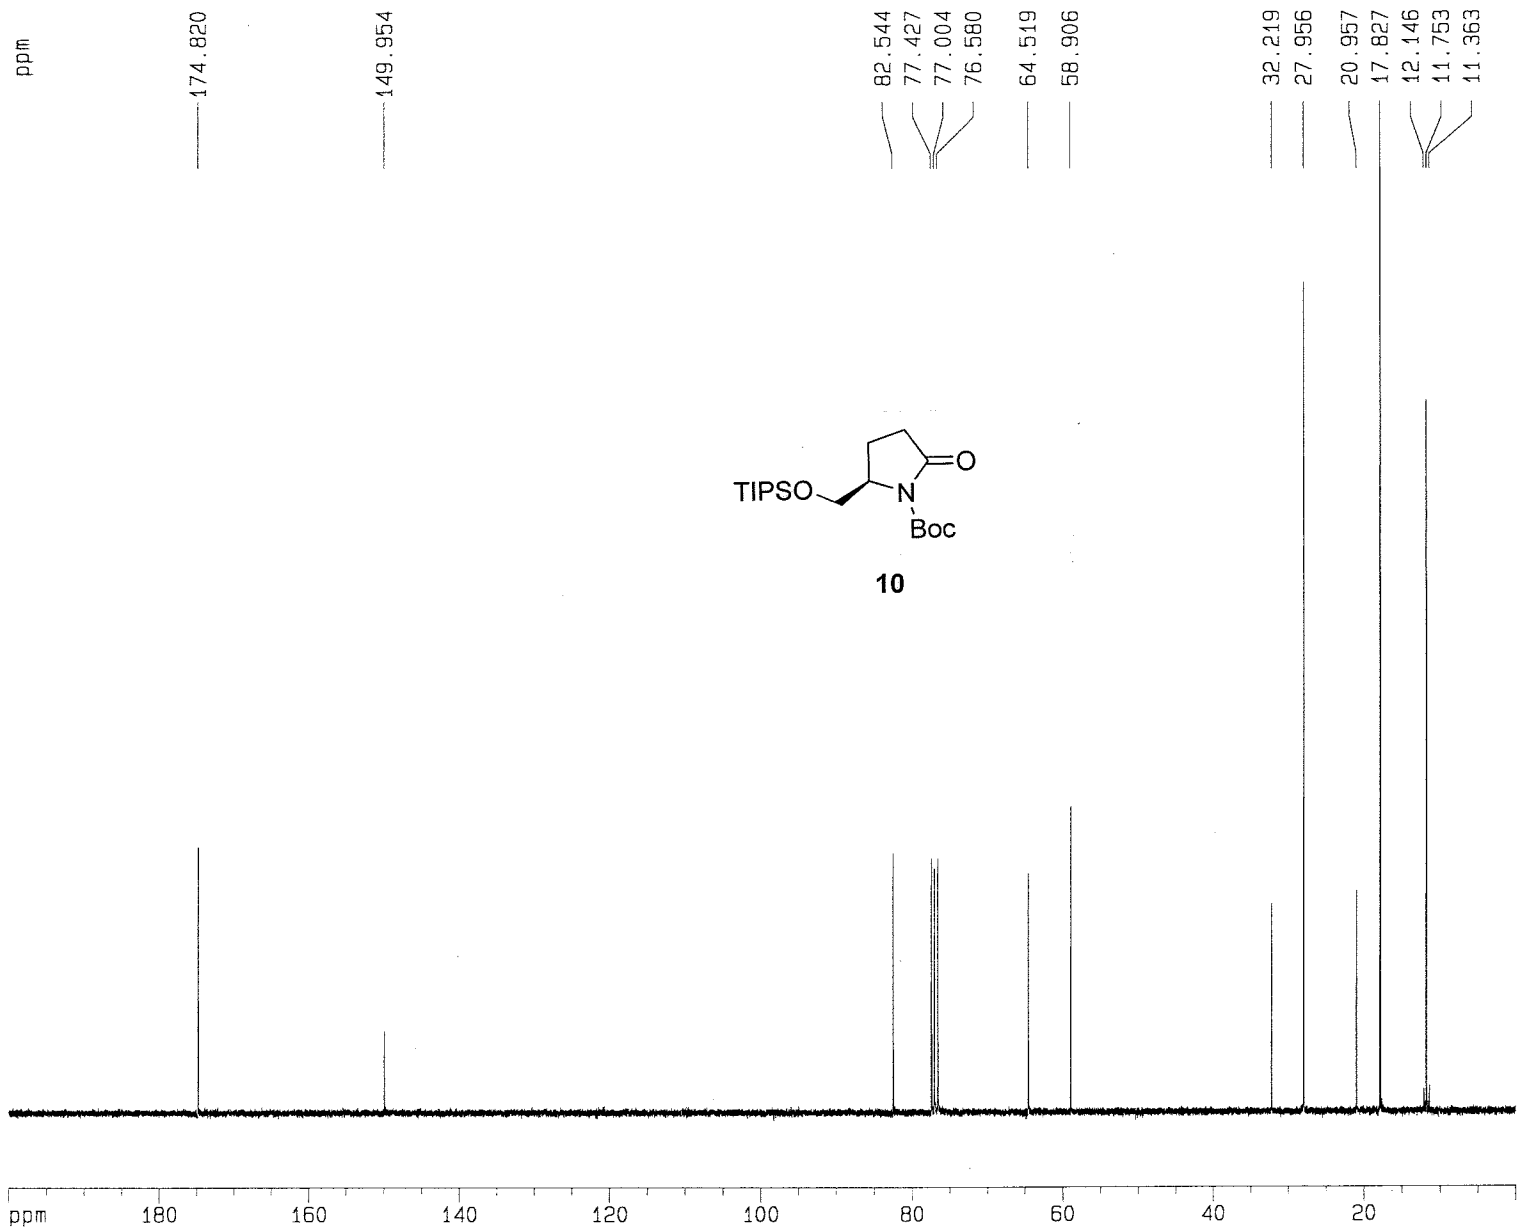

Current Data Parameters  
 NAME 071908mgn  
 EXPNO 123713  
 PROCNO 1

F2 - Acquisition Parameters  
 Date\_ 20080719  
 Time 17.33  
 INSTRUM spect  
 PROBHD 5 mm Multinu  
 PULPROG zgpg30  
 TD 65536  
 SOLVENT CDC13  
 NS 1024  
 DS 4  
 SWH 18832.393 Hz  
 FIDRES 0.287360 Hz  
 AQ 1.7400308 sec  
 RG 16384  
 DW 26.550 usec  
 DE 6.00 usec  
 TE 300.0 K  
 D1 2.0000000 sec  
 d11 0.0300000 sec  
 d12 0.0000200 sec

===== CHANNEL f1 =====  
 NUC1 13C  
 P1 11.80 usec  
 PL1 0.00 dB  
 SF01 75.4760200 MHz

===== CHANNEL f2 =====  
 CPDPRG2 waltz16  
 NUC2 1H  
 PCPD2 110.00 usec  
 PL2 0.00 dB  
 PL12 17.50 dB  
 PL13 17.50 dB  
 SF02 300.1312005 MHz

F2 - Processing parameters  
 SI 32768  
 SF 75.4677549 MHz  
 WDW no  
 SSB 0  
 LB 0.00 Hz  
 GB 0  
 PC 1.40

1D NMR plot parameters  
 CX 20.00 cm  
 F1P 200.000 ppm  
 F1 15093.55 Hz  
 F2P 0.000 ppm  
 F2 0.00 Hz  
 PPMCM 10.00000 ppm/cm  
 HZCM 754.67761 Hz/cm

Hz

Integral

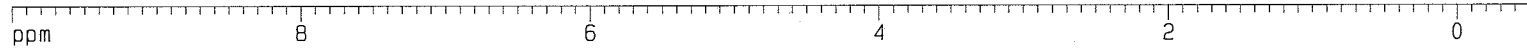

2905.06  
 2613.16  
 2559.13  
 1990.13  
 1955.79  
 1687.24  
 1655.78  
 1535.92  
 1528.11  
 1437.94  
 1429.84  
 1109.52  
 1091.63  
 1082.52  
 621.74  
 588.84  
 572.98  
 501.94  
 479.68  
 451.62  
 443.28  
 436.19  
 421.19

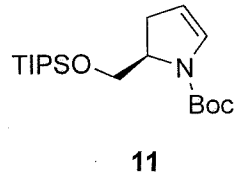

0.912  
 0.938  
 0.977  
 1.597  
 0.477  
 2.000  
 9.621  
 22.642

Current Data Parameters  
 NAME 071908mgn  
 EXPNO 123908  
 PROCNO 1

F2 - Acquisition Parameters  
 Date\_ 20080719  
 Time 15.10  
 INSTRUM spect  
 PROBHD 5 mm BBI 1H-B  
 PULPROG zg30  
 TD 65536  
 SOLVENT CDC13  
 NS 16  
 DS 2  
 SWH 8278.146 Hz  
 FIDRES 0.126314 Hz  
 AQ 3.9584243 sec  
 RG 362  
 DW 60.400 usec  
 DE 6.00 usec  
 TE 300.0 K  
 D1 1.00000000 sec

===== CHANNEL f1 =====  
 NUC1 1H  
 P1 6.45 usec  
 PL1 0.00 dB  
 SF01 400.1324710 MHz

F2 - Processing parameters  
 SI 32768  
 SF 400.1300089 MHz  
 WDW no  
 SSB 0  
 LB 0.00 Hz  
 GB 0  
 PC 1.00

1D NMR plot parameters  
 CX 20.00 cm  
 F1P 10.000 ppm  
 F1 4001.30 Hz  
 F2P -0.500 ppm  
 F2 -200.07 Hz  
 PPMCM 0.52500 ppm/cm  
 HZCM 210.06825 Hz/cm

ppm

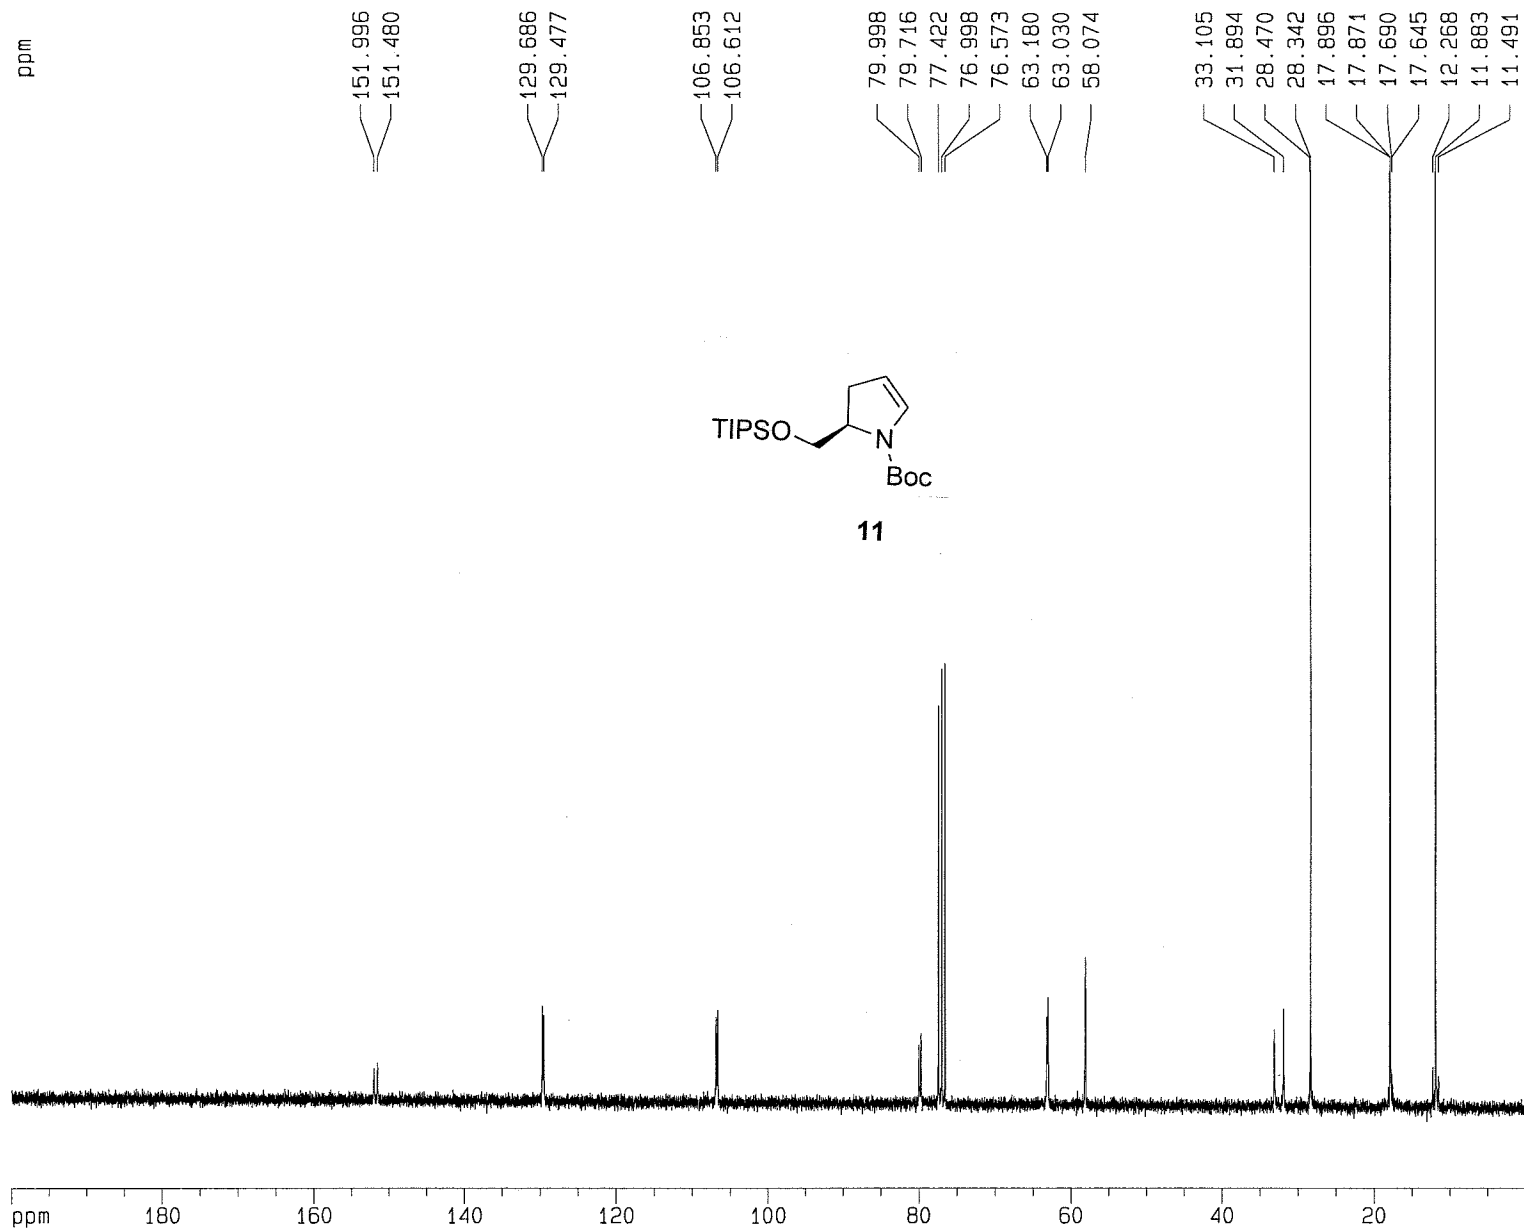

Current Data Parameters  
 NAME 071908mgn  
 EXPNO 123913  
 PROCNO 1

## F2 - Acquisition Parameters

Date\_ 20080719  
 Time 17.05  
 INSTRUM spect  
 PROBHD 5 mm GNP 1H/1  
 PULPROG zgpg30  
 TD 65536  
 SOLVENT CDC13  
 NS 1024  
 DS 4  
 SWH 18796.992 Hz  
 FIDRES 0.286819 Hz  
 AQ 1.7433076 sec  
 RG 812.7  
 DW 26.600 usec  
 DE 6.00 usec  
 TE 300.0 K  
 D1 2.00000000 sec  
 D11 0.03000000 sec  
 D12 0.00002000 sec

===== CHANNEL f1 =====  
 NUC1 13C  
 P1 5.40 usec  
 PL1 -6.00 dB  
 SFO1 75.4106357 MHz

===== CHANNEL f2 =====  
 CPDPRG2 waltz16  
 NUC2 1H  
 PCPD2 115.00 usec  
 PL2 0.00 dB  
 PL12 20.00 dB  
 PL13 20.00 dB  
 SFO2 299.8711995 MHz

F2 - Processing parameters  
 SI 32768  
 SF 75.4023763 MHz  
 WDW no  
 SSB 0  
 LB 0.00 Hz  
 GB 0  
 PC 1.40

1D NMR plot parameters  
 CX 20.00 cm  
 F1P 200.000 ppm  
 F1 15080.47 Hz  
 F2P 0.000 ppm  
 F2 0.00 Hz  
 PPMCM 10.00000 ppm/cm  
 HZCM 754.02374 Hz/cm

3898.92  
 3818.41  
 3008.53  
 2952.40  
 2905.00  
 2799.38  
 2182.63  
 1748.49  
 1651.35  
 1644.34  
 1540.01  
 1502.86  
 1432.36  
 1425.50  
 1175.75  
 867.39  
 816.64  
 719.92  
 668.41  
 605.57  
 596.14  
 587.95  
 565.89  
 554.54  
 541.31  
 440.77  
 437.21  
 432.47  
 429.72  
 425.33  
 423.49  
 418.06  
 413.59  
 407.94  
 403.37

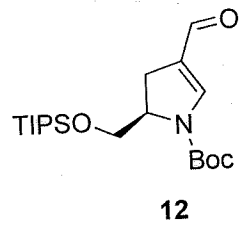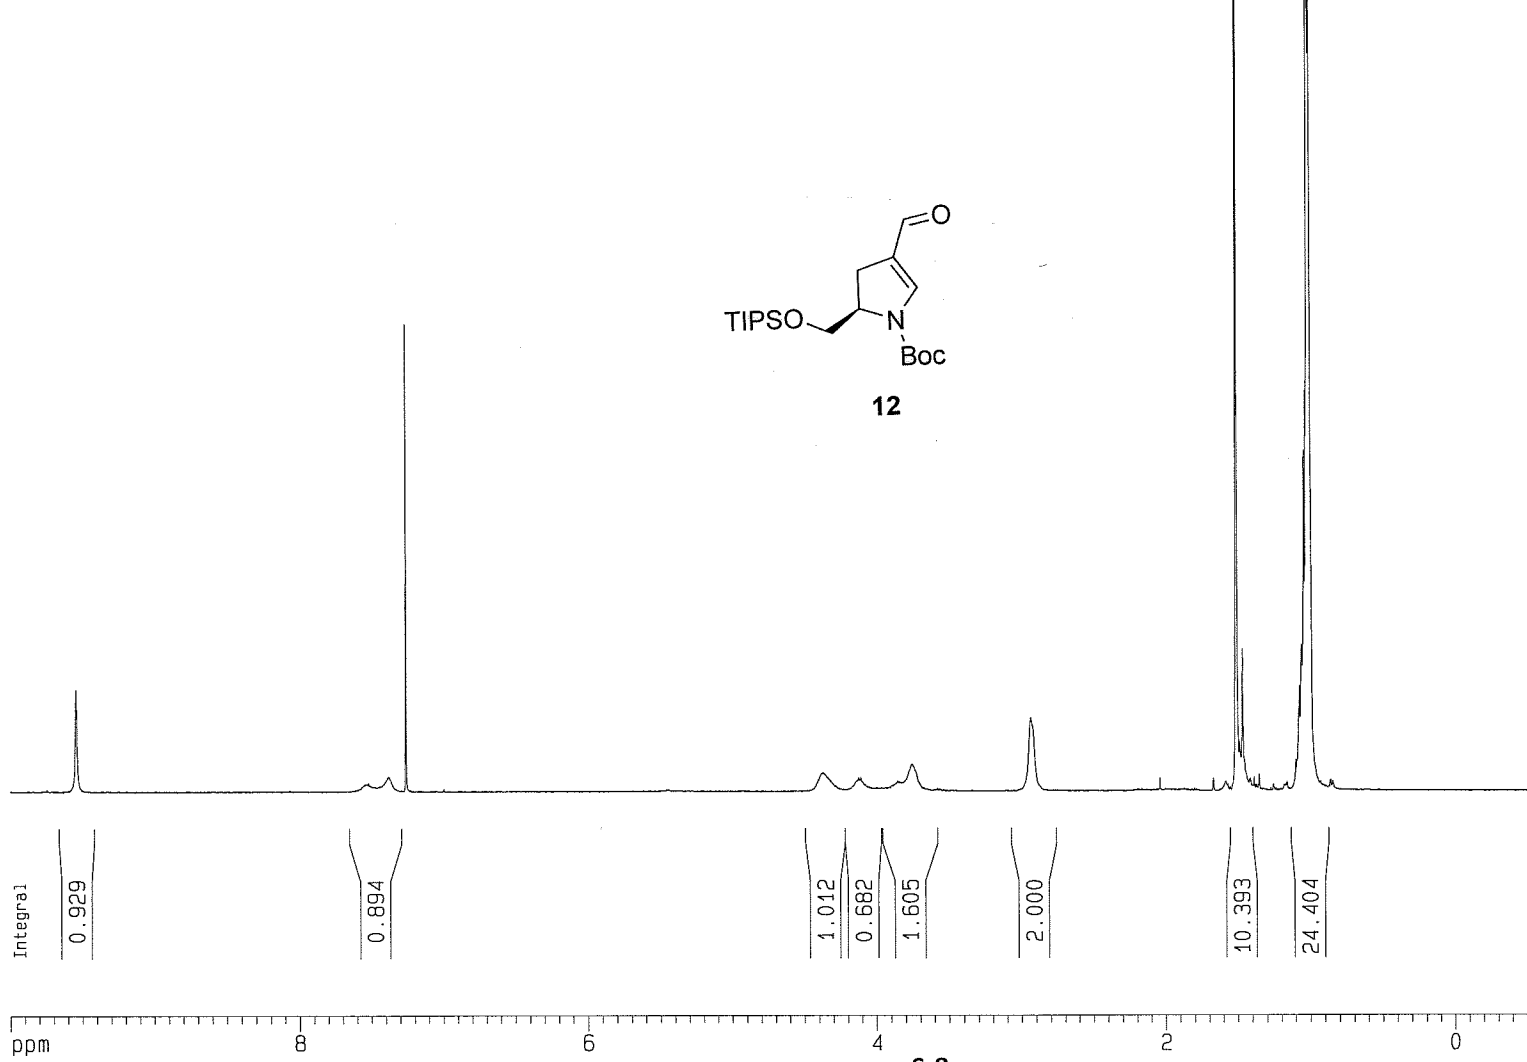

Current Data Parameters  
 NAME 071908mg  
 EXPNO 124108  
 PROCNO 1

F2 - Acquisition Parameters  
 Date\_ 20080719  
 Time 14.14  
 INSTRUM spect  
 PROBHD 5 mm BBI 1H-B  
 PULPROG zg30  
 TO 65536  
 SOLVENT CDCl3  
 NS 16  
 DS 2  
 SWH 8278.146 Hz  
 FIDRES 0.126314 Hz  
 AQ 3.9584243 sec  
 RG 256  
 DW 60.400 usec  
 DE 6.00 usec  
 TE 300.0 K  
 D1 1.00000000 sec

===== CHANNEL f1 =====  
 NUC1 1H  
 P1 6.45 usec  
 PL1 0.00 dB  
 SF01 400.1324710 MHz

F2 - Processing parameters  
 SI 32768  
 SF 400.1300091 MHz  
 WDW no  
 SSB 0  
 LB 0.00 Hz  
 GB 0  
 PC 1.00

1D NMR plot parameters  
 CX 20.00 cm  
 F1P 10.000 ppm  
 F1 4001.30 Hz  
 F2P -0.500 ppm  
 F2 -200.07 Hz  
 PPMCM 0.52500 ppm/cm  
 HZCM 210.06825 Hz/cm



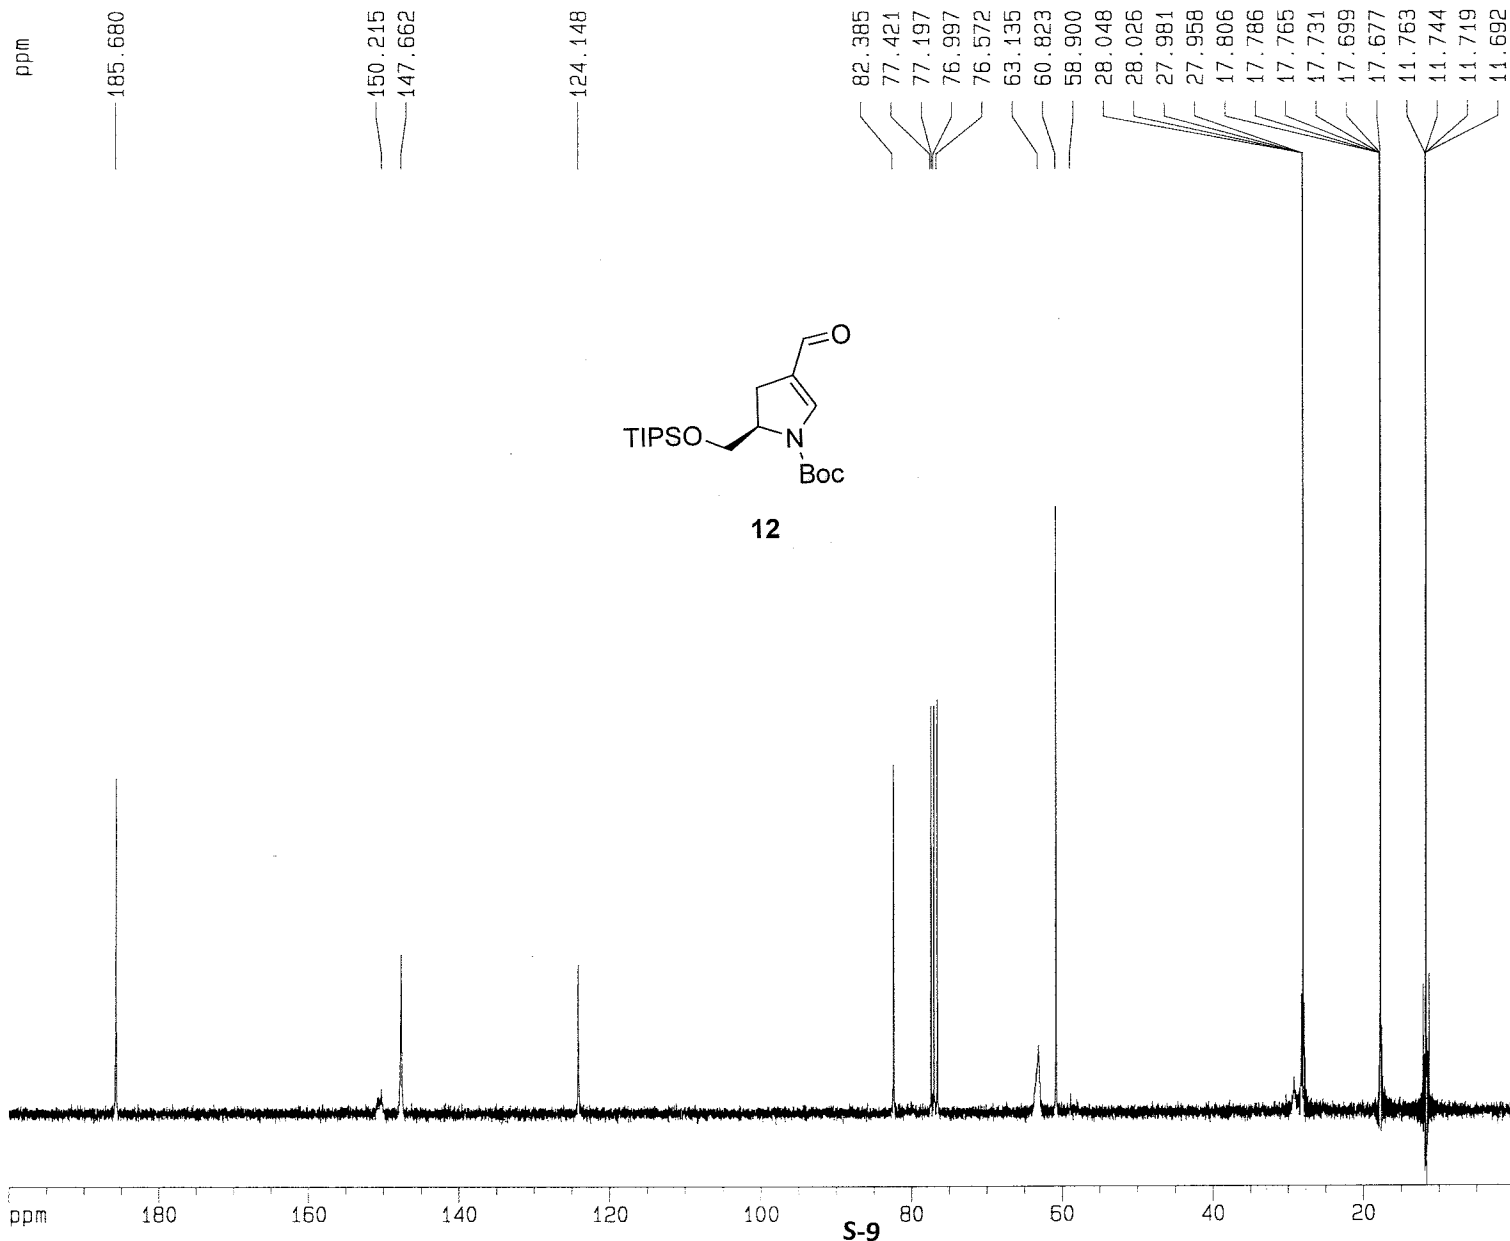

Current Data Parameters  
 NAME 072108mgn  
 EXPNO 124109  
 PROCNO 1

F2 - Acquisition Parameters  
 Date\_ 20080721  
 Time 19.14  
 INSTRUM spect  
 PROBHD 5 mm Multinu  
 PULPROG zgpg30  
 TO 24576  
 SOLVENT CDCl3  
 NS 2048  
 DS 4  
 SWH 18632.393 Hz  
 FIDRES 0.766292 Hz  
 AQ 0.6525428 sec  
 RG 16384  
 DW 26.550 usec  
 DE 6.00 usec  
 TE 300.0 K  
 D1 2.00000000 sec  
 d11 0.03000000 sec  
 d12 0.00002000 sec

===== CHANNEL f1 =====  
 NUC1 13C  
 P1 11.80 usec  
 PL1 0.00 dB  
 SF01 75.4760200 MHz

===== CHANNEL f2 =====  
 CPDPRG2 waltz16  
 NUC2 1H  
 PCPD2 110.00 usec  
 PL2 0.00 dB  
 PL12 17.50 dB  
 PL13 17.50 dB  
 SF02 300.1312005 MHz

F2 - Processing parameters  
 SI 32768  
 SF 75.4677566 MHz  
 WDW no  
 SSB 0  
 LB 0.00 Hz  
 GB 0  
 PC 1.40

1D NMR plot parameters  
 CX 20.00 cm  
 F1P 200.000 ppm  
 F1 15093.55 Hz  
 F2P 0.000 ppm  
 F2 0.00 Hz  
 PPMCM 10.00000 ppm/cm  
 HZCM 754.67761 Hz/cm

Hz

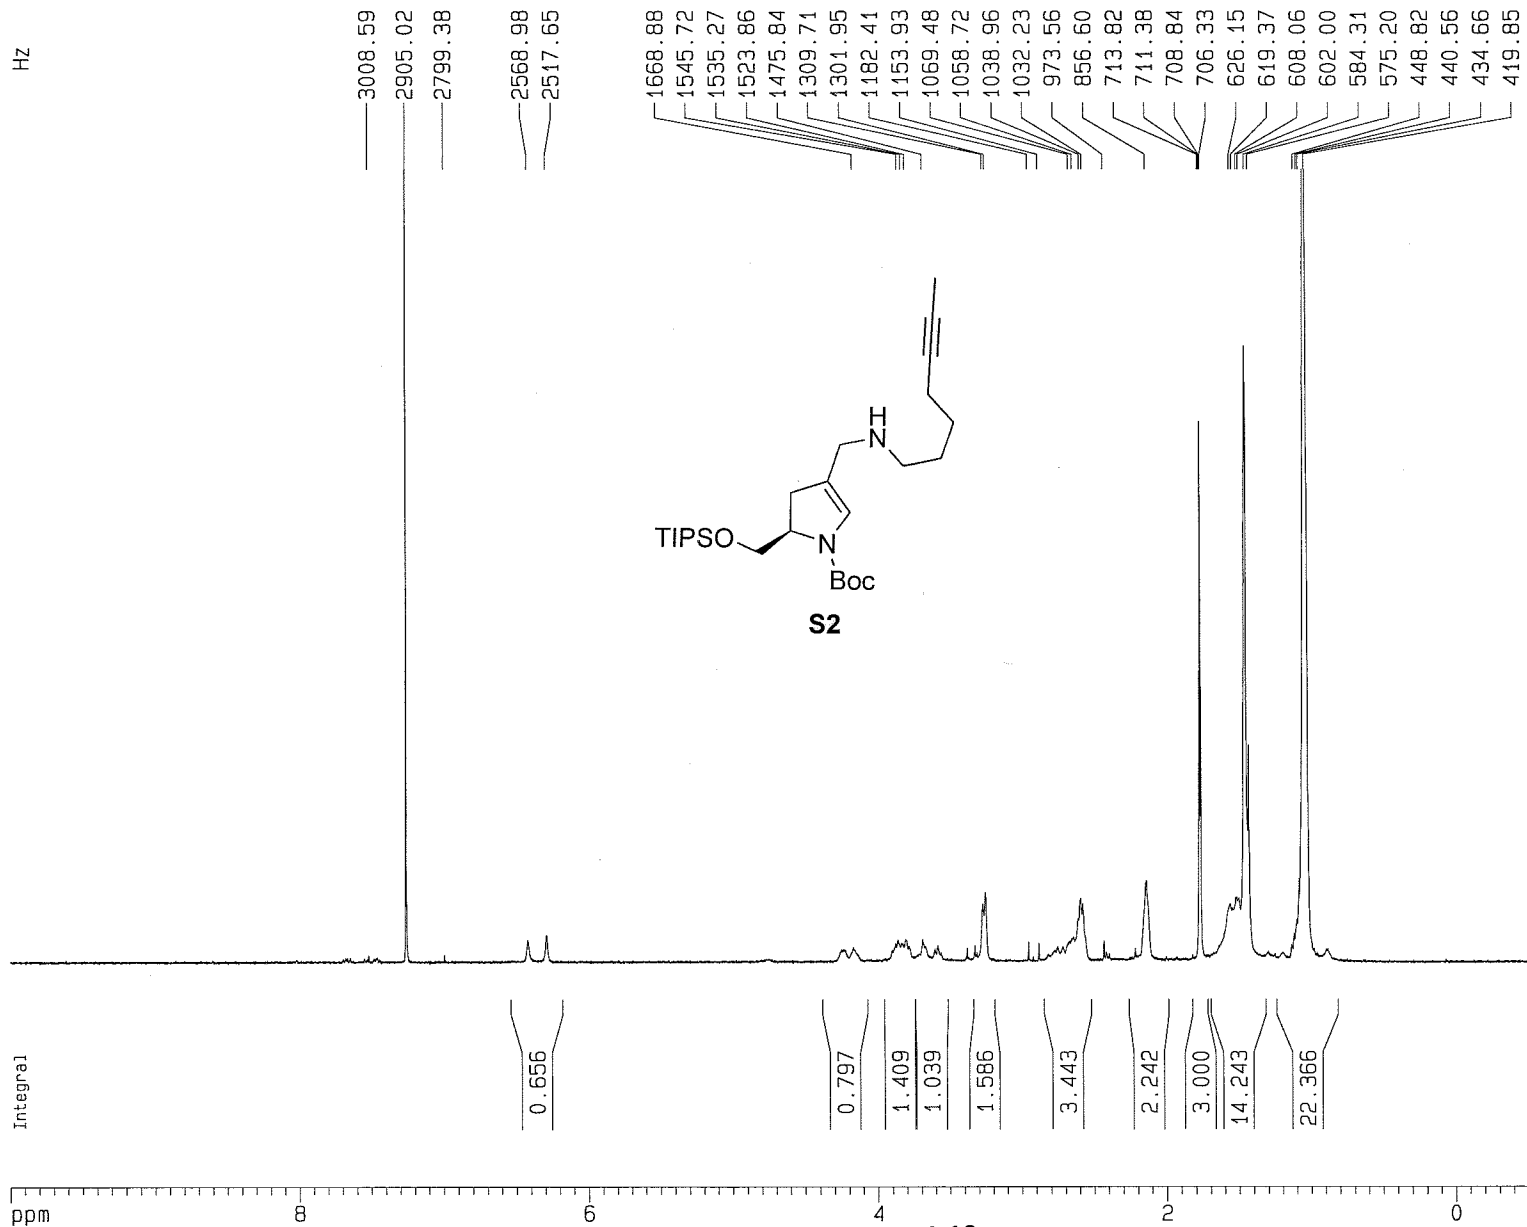

Current Data Parameters  
 NAME 072208mgn  
 EXPNO 130808  
 PROCNO 1

F2 - Acquisition Parameters  
 Date\_ 20080722  
 Time 15.38  
 INSTRUM spect  
 PROBHD 5 mm BBI 1H-B  
 PULPROG zg30  
 TD 65536  
 SOLVENT CDCl3  
 NS 16  
 DS 2  
 SWH 8278.146 Hz  
 FIDRES 0.126314 Hz  
 AQ 3.9584243 sec  
 RG 406.4  
 DW 60.400 usec  
 DE 6.00 usec  
 TE 300.0 K  
 D1 1.00000000 sec

==== CHANNEL f1 =====  
 NUC1 1H  
 P1 6.45 usec  
 PL1 0.00 dB  
 SF01 400.1324710 MHz

F2 - Processing parameters  
 SI 32768  
 SF 400.1300091 MHz  
 WDW no  
 SSB 0  
 LB 0.00 Hz  
 GB 0  
 PC 1.00

1D NMR plot parameters  
 CX 20.00 cm  
 F1P 10.000 ppm  
 F1 4001.30 Hz  
 F2P -0.500 ppm  
 F2 -200.07 Hz  
 PPMCM 0.52500 ppm/cm  
 HZCM 210.06825 Hz/cm

Integral

ppm

S-10



Hz

Integral

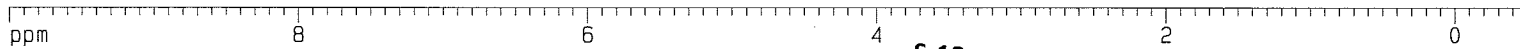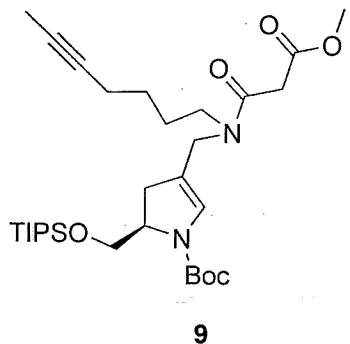

2904.94  
 2799.42  
 2592.45  
 2544.85  
 2515.70  
 1624.35  
 1555.99  
 1500.32  
 1495.27  
 1392.19  
 1387.46  
 1376.76  
 1351.52  
 1343.74  
 1285.06  
 1277.70  
 1049.16  
 1038.00  
 868.26  
 861.71  
 713.51  
 710.96  
 708.79  
 707.67  
 705.20  
 668.26  
 661.12  
 653.82  
 621.17  
 587.28  
 579.85  
 575.42  
 434.71  
 418.42

0.747  
 6.858  
 1.589  
 2.032  
 1.914  
 2.000  
 2.844  
 1.971  
 1.128  
 10.223  
 19.830

Current Data Parameters  
 NAME 072208mgn  
 EXPNO 131108  
 PROCNO 1

F2 - Acquisition Parameters  
 Date\_ 20080722  
 Time 15.46  
 INSTRUM spect  
 PROBHD 5 mm BBI 1H-B  
 PULPROG zg30  
 TD 65536  
 SOLVENT CDC13  
 NS 16  
 DS 2  
 SWH 8278.146 Hz  
 FIDRES 0.126314 Hz  
 AQ 3.9584243 sec  
 RG 512  
 DW 60.400 usec  
 DE 6.00 usec  
 TE 300.0 K  
 D1 1.00000000 sec

===== CHANNEL f1 =====  
 NUC1 1H  
 P1 6.45 usec  
 PL1 0.00 dB  
 SFO1 400.1324710 MHz

F2 - Processing parameters  
 SI 32768  
 SF 400.1300091 MHz  
 WDW no  
 SSB 0  
 LB 0.00 Hz  
 GB 0  
 PC 1.00

1D NMR plot parameters  
 CX 20.00 cm  
 F1P 10.000 ppm  
 F1 4001.30 Hz  
 F2P -0.500 ppm  
 F2 -200.07 Hz  
 PPMCM 0.52500 ppm/cm  
 HZCM 210.06825 Hz/cm



ppm

Hz

2179.07

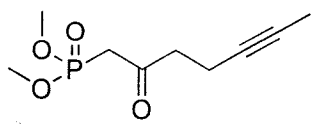

13

1145.83  
 1142.30  
 1139.70  
 1138.76  
 1138.17  
 1135.12  
 1133.56  
 1131.06  
 1128.99  
 1127.99  
 945.69  
 922.99  
 849.92  
 842.86  
 835.50  
 727.91  
 725.38  
 722.93  
 720.49  
 717.93  
 716.14  
 525.30  
 522.73  
 520.18

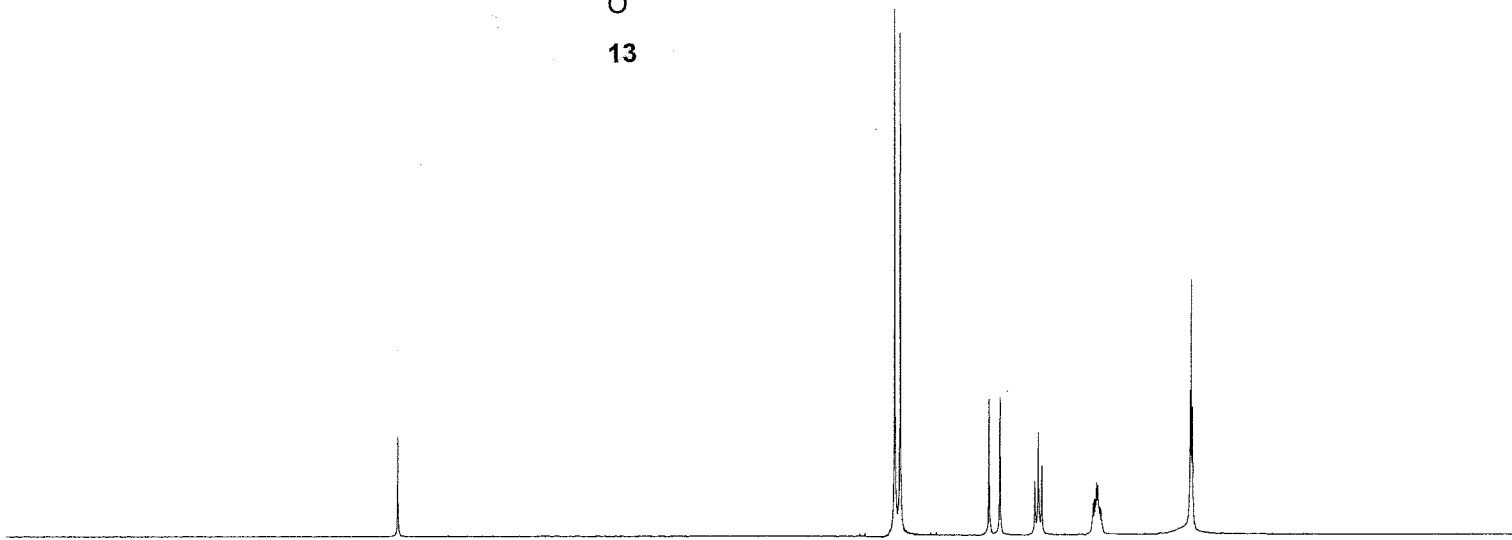

5.7184  
 1.0000  
 1.0264  
 1.9326  
 1.9670  
 3.2925

Current Data Parameters  
 NAME 070308mgn  
 EXPNO 11945  
 PROCNO 1

F2 - Acquisition Parameters  
 Date\_ 20080703  
 Time 17.12  
 INSTRUM spect  
 PROBHD 5 mm Multinu  
 PULPROG zg30  
 TD 24576  
 SOLVENT CDC13  
 NS 16  
 DS 2  
 SWH 6172.839 Hz  
 FIDRES 0.251173 Hz  
 AQ 1.9907050 sec  
 RG 574.7  
 DW 81.000 usec  
 DE 6.00 usec  
 TE 300.0 K  
 D1 1.00000000 sec

===== CHANNEL f1 =====  
 NUC1 1H  
 P1 9.60 usec  
 PL1 -6.00 dB  
 SF01 300.1318534 MHz

F2 - Processing parameters  
 SI 32768  
 SF 300.1300058 MHz  
 WDW no  
 SSB 0  
 LB 0.00 Hz  
 GB 0  
 PC 1.00

1D NMR plot parameters  
 CX 20.00 cm  
 F1P 10.000 ppm  
 F1 3001.30 Hz  
 F2P -0.500 ppm  
 F2 -150.07 Hz  
 PPMCM 0.52500 Hz/cm  
 HZCM 157.56825 Hz/cm

ppm  
200.008  
199.925

77.454  
77.030  
77.003  
76.599  
76.037  
52.874  
52.789  
43.066  
41.889  
40.189  
12.991  
3.151

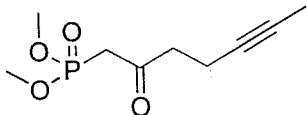

13

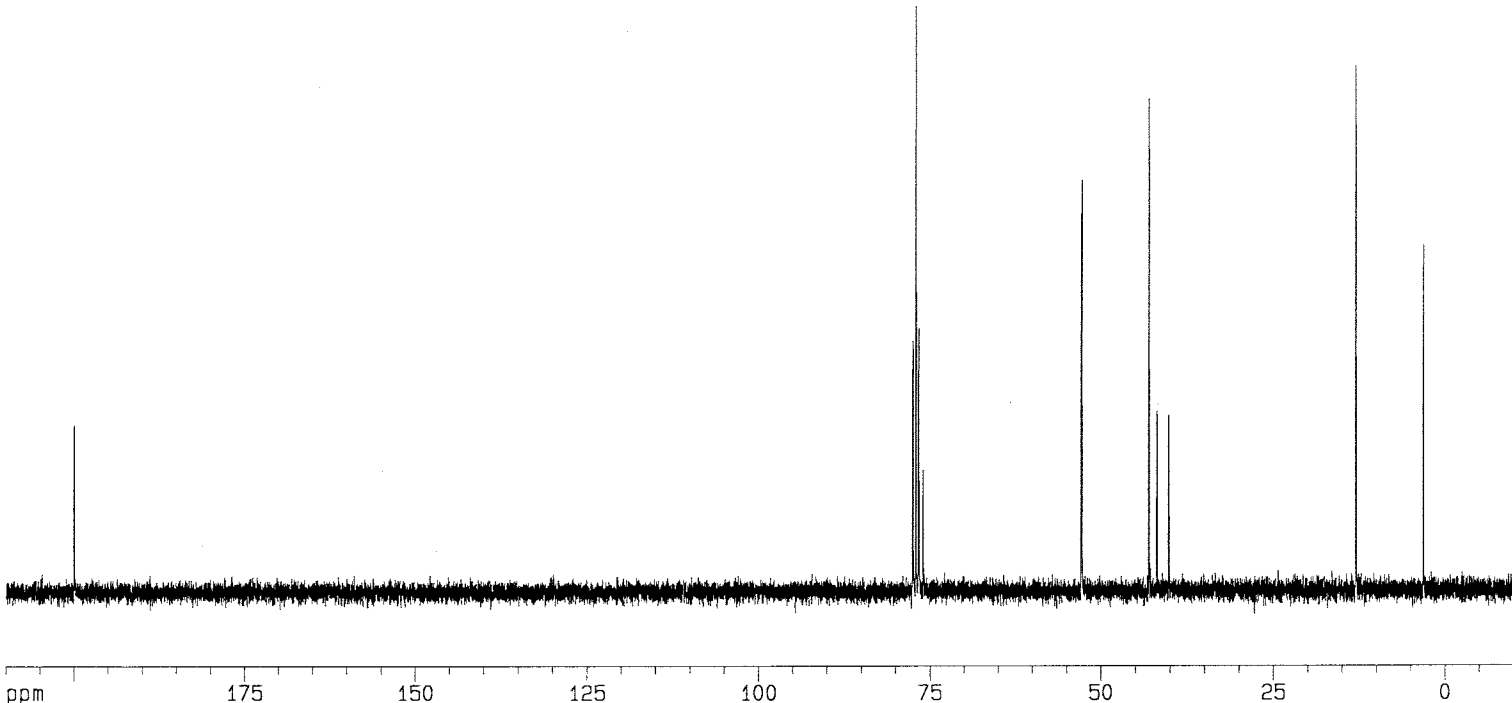

S-15

Current Data Parameters  
NAME 052608mgn  
EXPNO 11943  
PROCNO 1

F2 - Acquisition Parameters  
Date\_ 20080526  
Time 17.52  
INSTRUM spect  
PROBHD 5 mm Multinu  
PULPROG zgpg30  
TD 24576  
SOLVENT CDC13  
NS 771  
DS 4  
SWH 18832.393 Hz  
FIDRES 0.766292 Hz  
AQ 0.6525428 sec  
RG 11585.2  
DW 26.550 usec  
DE 6.00 usec  
TE 300.0 K  
D1 2.0000000 sec  
d11 0.0300000 sec  
d12 0.0000200 sec

===== CHANNEL f1 =====  
NUC1 13C  
P1 11.80 usec  
PL1 0.00 dB  
SFO1 75.4760200 MHz

===== CHANNEL f2 =====  
CPDPRG2 waltz16  
NUC2 1H  
PCPD2 110.00 usec  
PL2 0.00 dB  
PL12 17.50 dB  
PL13 17.50 dB  
SFO2 300.1312005 MHz

F2 - Processing parameters  
SI 32768  
SF 75.4677578 MHz  
WDW no  
SSB 0  
LB 0.00 Hz  
GB 0  
PC 1.40

1D NMR plot parameters  
CX 20.00 cm  
F1P 210.000 ppm  
F1 15848.23 Hz  
F2P -10.000 ppm  
F2 -754.68 Hz  
PPMCM 11.00000 ppm/cm  
HZCM 830.14532 Hz/cm

Hz

2904.98  
 2533.06  
 2531.52  
 2529.88  
 2078.62  
 2078.19  
 1891.12  
 1890.72  
 1093.05  
 1086.00  
 1078.56  
 973.87  
 971.30  
 968.71  
 966.31  
 964.72  
 963.80  
 959.52  
 851.55  
 837.47  
 827.80  
 701.06  
 698.54  
 696.02

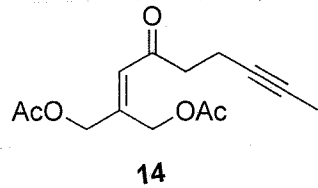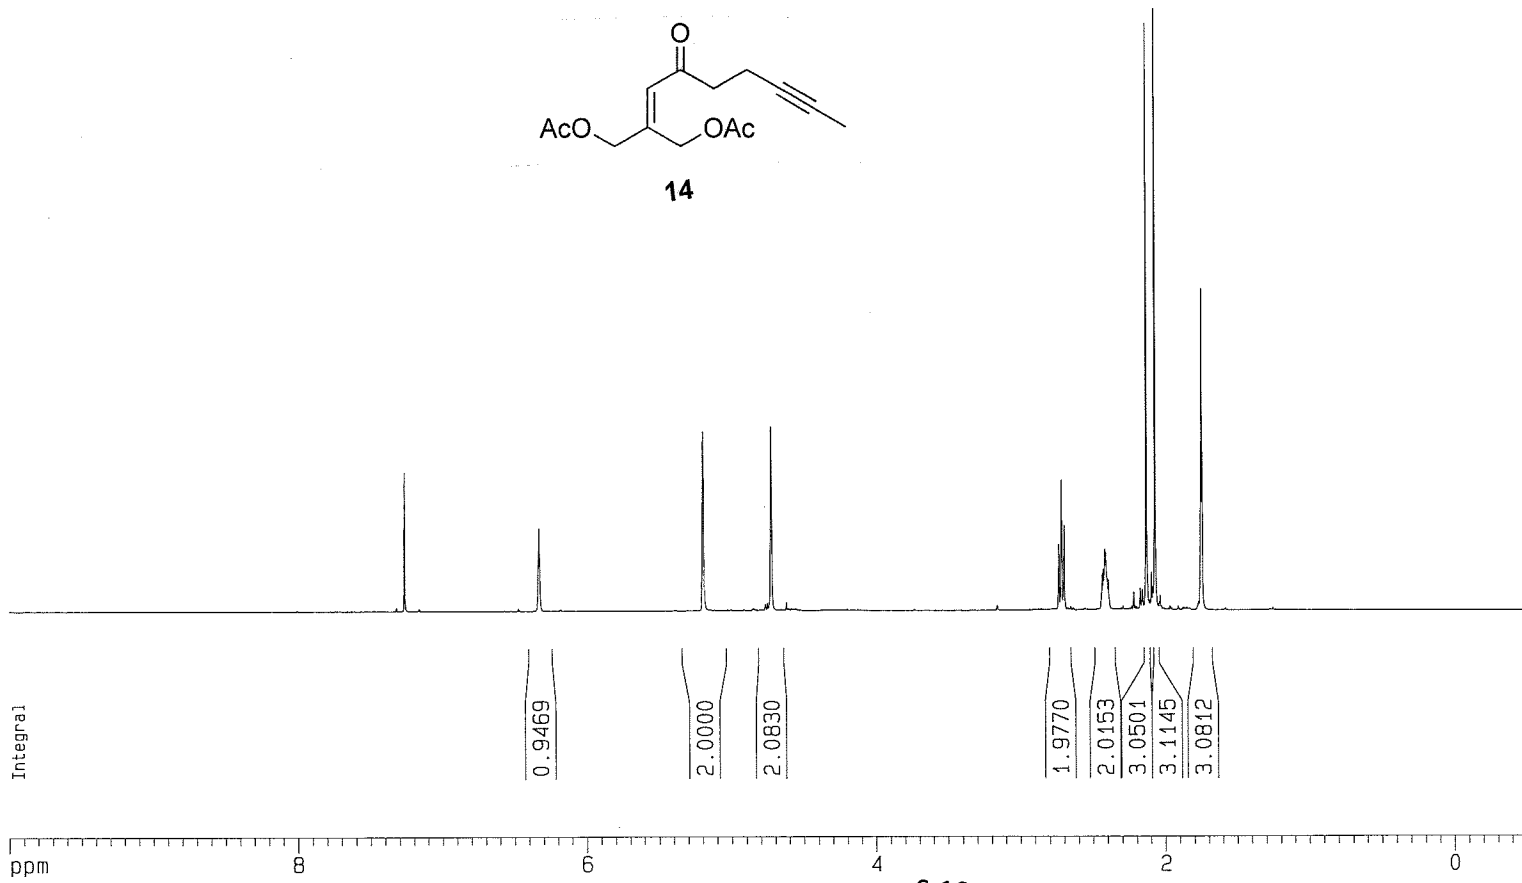

Current Data Parameters  
 NAME 071908mgn  
 EXPNO 119608  
 PROCNO 1

F2 - Acquisition Parameters  
 Date\_ 20080719  
 Time 14.06  
 INSTRUM spect  
 PROBHD 5 mm BBI 1H-B  
 PULPROG zg30  
 TD 65536  
 SOLVENT CDC13  
 NS 16  
 DS 2  
 SWH 8278.146 Hz  
 FIDRES 0.126314 Hz  
 AQ 3.9584243 sec  
 RG 362  
 DW 60.400 usec  
 DE 6.00 usec  
 TE 300.0 K  
 D1 1.00000000 sec

===== CHANNEL f1 =====  
 NUC1 1H  
 P1 6.45 usec  
 PL1 0.00 dB  
 SF01 400.1324710 MHz

F2 - Processing parameters  
 SI 32768  
 SF 400.1300089 MHz  
 WDW no  
 SSB 0  
 LB 0.00 Hz  
 GB 0  
 PC 1.00

1D NMR plot parameters  
 CX 20.00 cm  
 F1P 10.000 ppm  
 F1 4001.30 Hz  
 F2P -0.500 ppm  
 F2 -200.07 Hz  
 PPMCM 0.52500 ppm/cm  
 HZCM 210.06825 Hz/cm



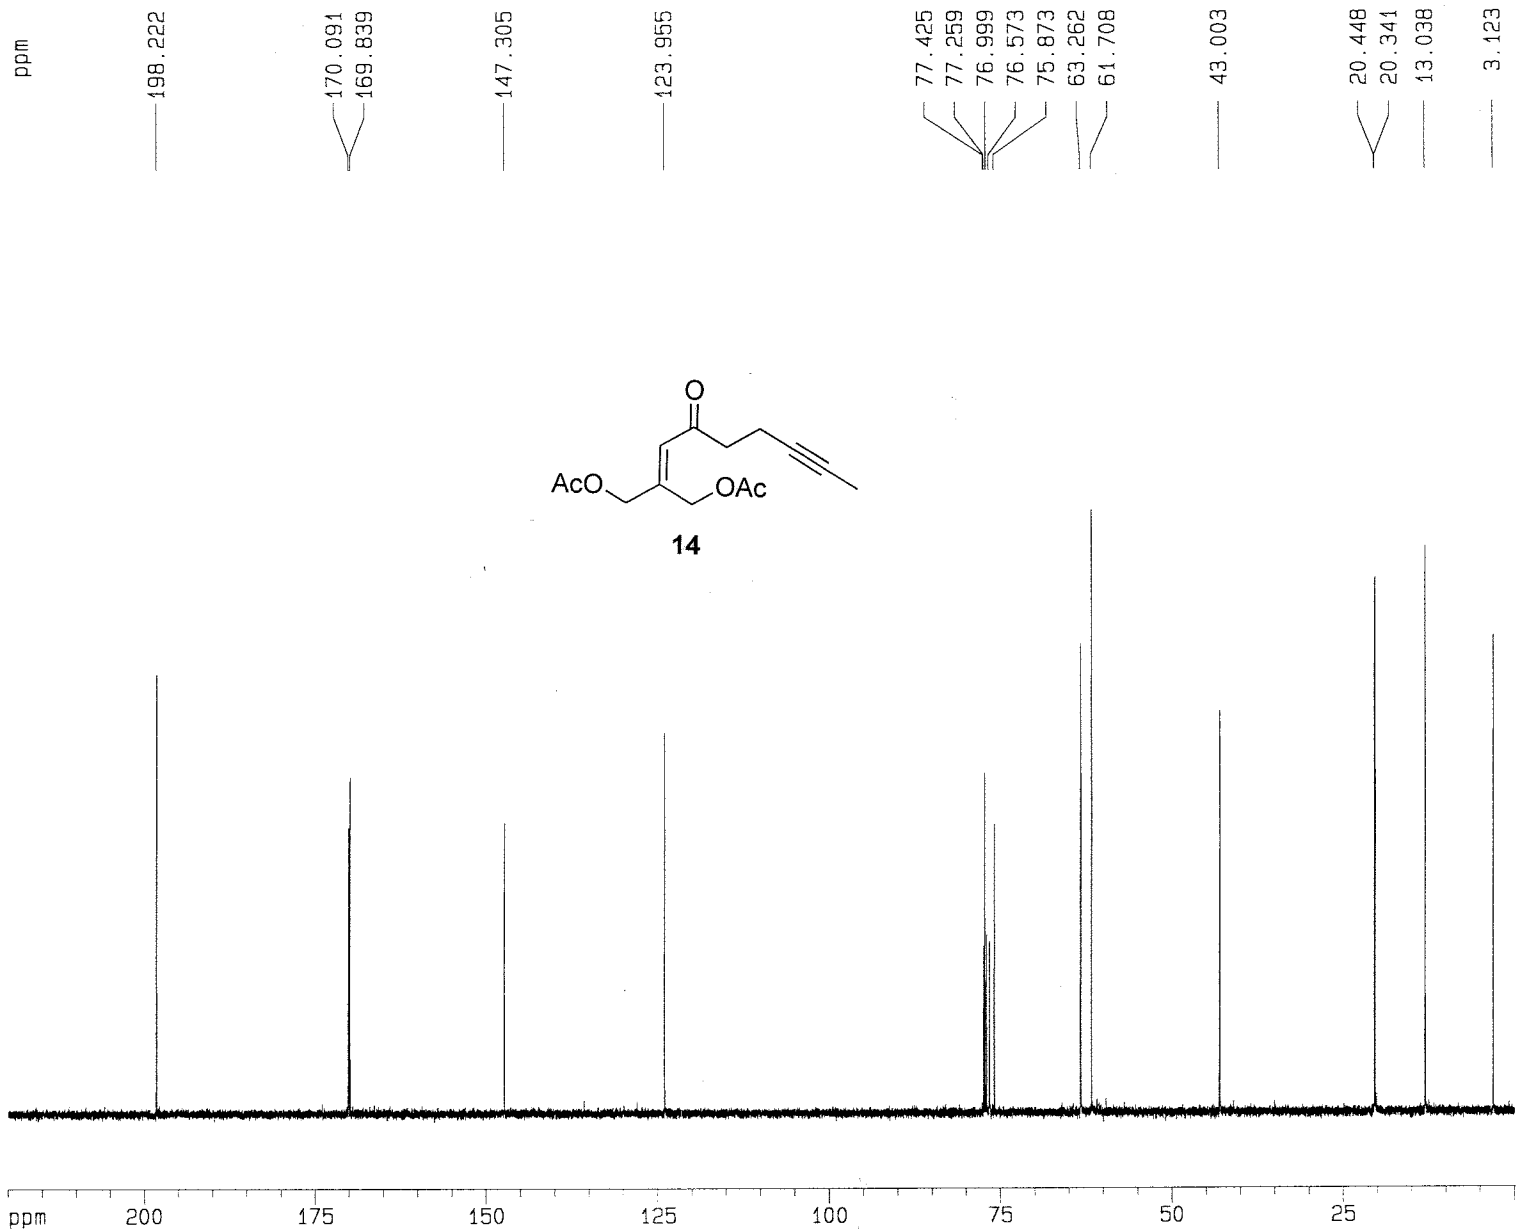

Current Data Parameters  
 NAME 071908mgn  
 EXPNO 119613  
 PROCNO 1

F2 - Acquisition Parameters  
 Date\_ 20080719  
 Time 15.21  
 INSTRUM spect  
 PROBHD 5 mm Multinu  
 PULPROG zgpg30  
 TD 65536  
 SOLVENT CDC13  
 NS 486  
 DS 4  
 SWH 18832.393 Hz  
 FIDRES 0.287360 Hz  
 AQ 1.7400308 sec  
 RG 13004  
 DW 26.550 usec  
 DE 6.00 usec  
 TE 300.0 K  
 D1 2.00000000 sec  
 d11 0.03000000 sec  
 d12 0.00002000 sec

===== CHANNEL f1 =====  
 NUC1 13C  
 P1 11.80 usec  
 PL1 0.00 dB  
 SF01 75.4760200 MHz

===== CHANNEL f2 =====  
 CPDPRG2 waltz16  
 NUC2 1H  
 PCPD2 110.00 usec  
 PL2 0.00 dB  
 PL12 17.50 dB  
 PL13 17.50 dB  
 SF02 300.1312005 MHz

F2 - Processing parameters  
 SI 32768  
 SF 75.4677629 MHz  
 WDW no  
 SSB 0  
 LB 0.00 Hz  
 GB 0  
 PC 1.40

1D NMR plot parameters  
 CX 20.00 cm  
 F1P 220.000 ppm  
 F1 16602.91 Hz  
 F2P 0.000 ppm  
 F2 0.00 Hz  
 PPMCM 11.00000 ppm/cm  
 HZCM 830.14545 Hz/cm

Hz

2185.41  
2179.01

1837.84

1351.66

843.31  
835.84  
828.29  
741.88  
739.35  
736.68  
734.22  
731.77  
727.14  
539.78  
531.33  
528.86  
459.37

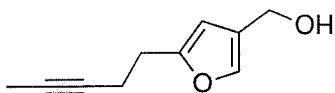

15

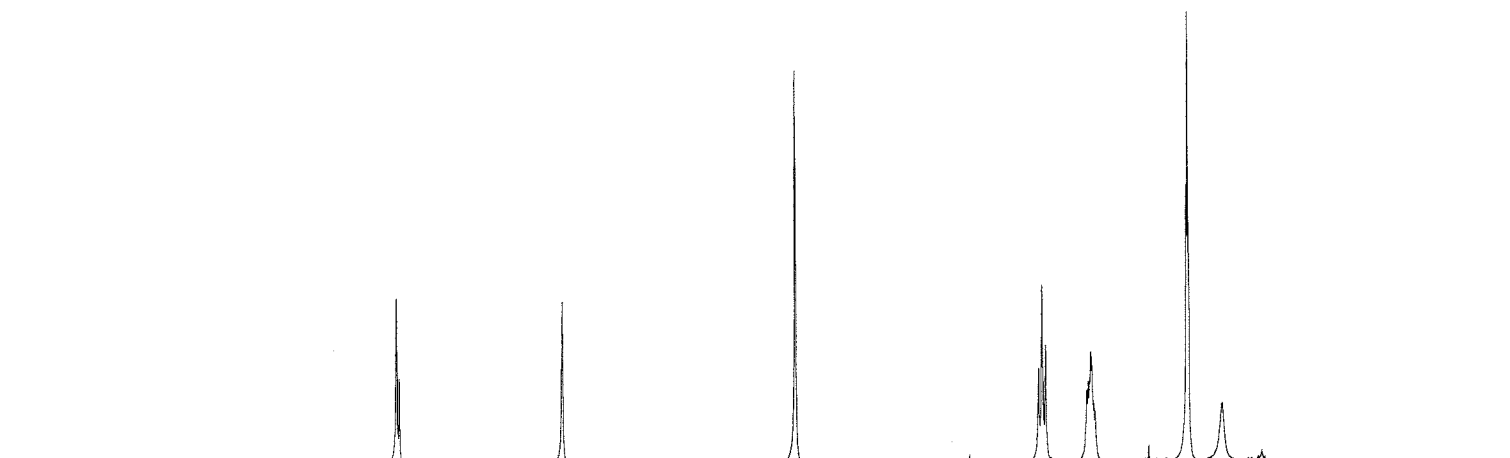

0.8805

1.0000

1.9327

1.9811

2.0569

3.0328

1.1319

Integral

ppm

Current Data Parameters  
 NAME 071808mgn  
 EXPNO 131408  
 PROCNO 1

F2 - Acquisition Parameters  
 Date\_ 20080718  
 Time 18.19  
 INSTRUM spect  
 PROBHD 5 mm Multinu  
 PULPROG zg30  
 TD 65536  
 SOLVENT CDC13  
 NS 16  
 DS 2  
 SWH 6172.839 Hz  
 FIDRES 0.094190 Hz  
 AQ 5.3084660 sec  
 RG 512  
 DW 81.000 usec  
 DE 6.00 usec  
 TE 300.0 K  
 D1 1.00000000 sec

===== CHANNEL f1 =====  
 NUC1 1H  
 P1 9.60 usec  
 PL1 -6.00 dB  
 SF01 300.1318534 MHz

F2 - Processing parameters  
 SI 32768  
 SF 300.1300060 MHz  
 WDW no  
 SSB 0  
 LB 0.00 Hz  
 GB 0  
 PC 1.00

1D NMR plot parameters  
 CX 20.00 cm  
 F1P 10.000 ppm  
 F1 3001.30 Hz  
 F2P -0.500 ppm  
 F2 -150.07 Hz  
 PPMCM 0.52500 ppm/cm  
 HZCM 157.56825 Hz/cm

ppm

155.431

138.153

125.662

105.550

77.831

77.426

77.001

76.576

76.177

56.392

27.841

17.661

3.234

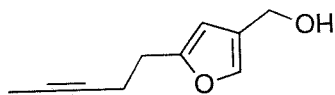

15

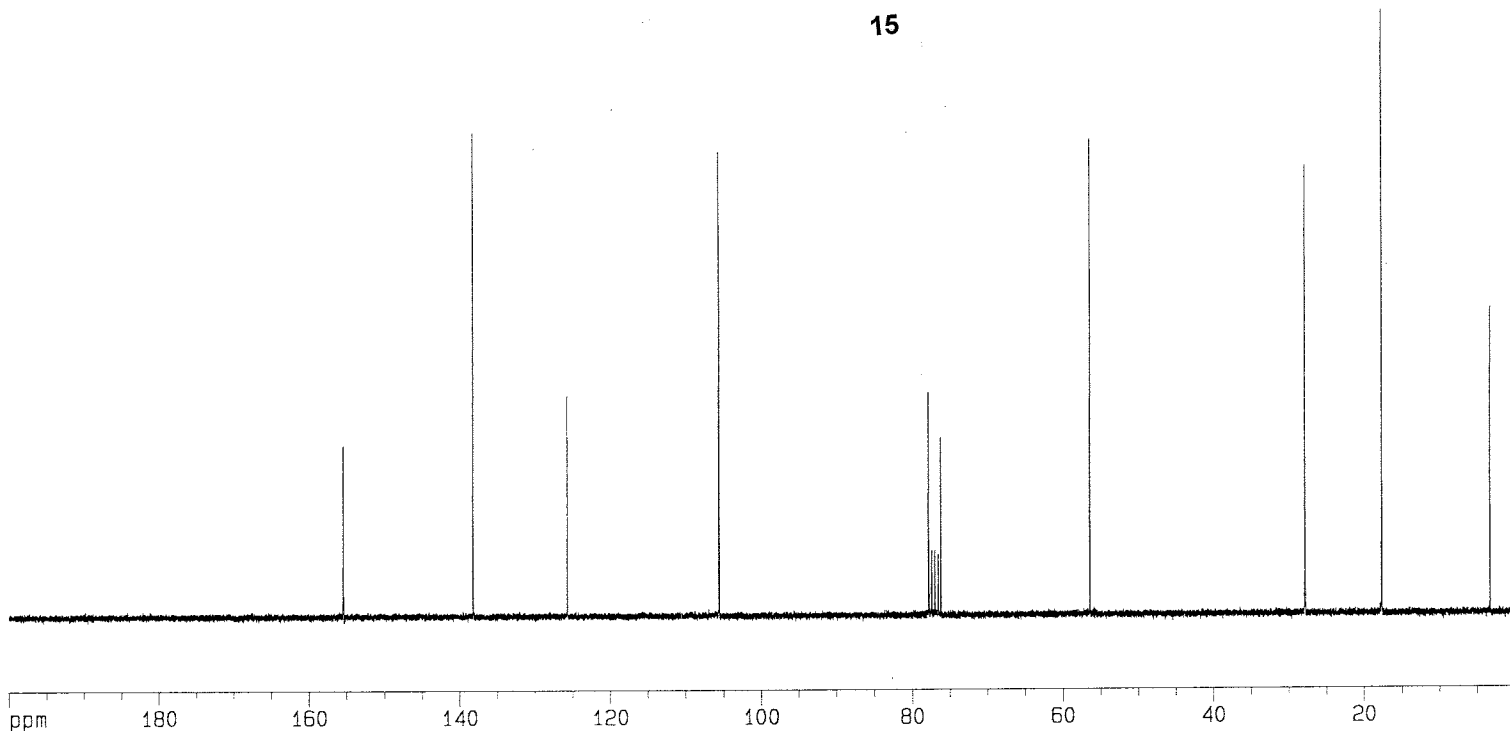

S-19

Current Data Parameters  
 NAME 071808mgn  
 EXPNO 12409  
 PROCNO 1

F2 - Acquisition Parameters  
 Date\_ 20080718  
 Time 19.35  
 INSTRUM spect  
 PROBHD 5 mm Multinu  
 PULPROG zgpg30  
 TD 65536  
 SOLVENT CDCl3  
 NS 500  
 DS 4  
 SWH 18832.393 Hz  
 FIDRES 0.287360 Hz  
 AQ 1.7400308 sec  
 RG 16384  
 DW 26.550 usec  
 DE 6.00 usec  
 TE 300.0 K  
 D1 2.00000000 sec  
 d11 0.03000000 sec  
 d12 0.00002000 sec

===== CHANNEL f1 =====  
 NUC1 13C  
 P1 11.80 usec  
 PL1 0.00 dB  
 SF01 75.4760200 MHz

===== CHANNEL f2 =====  
 CPDPRG2 waltz16  
 NUC2 1H  
 PCPD2 110.00 usec  
 PL2 0.00 dB  
 PL12 17.50 dB  
 PL13 17.50 dB  
 SF02 300.1312005 MHz

F2 - Processing parameters  
 SI 32768  
 SF 75.4677589 MHz  
 WDW nc  
 SSB 0  
 LB 0.00 Hz  
 GB 0  
 PC 1.40

1D NMR plot parameters  
 CX 20.00 cm  
 F1P 200.000 ppm  
 F1 15093.55 Hz  
 F2P 0.000 ppm  
 F2 0.00 Hz  
 PPMCM 10.00000 ppm/cm  
 HZCM 754.67761 Hz/cm

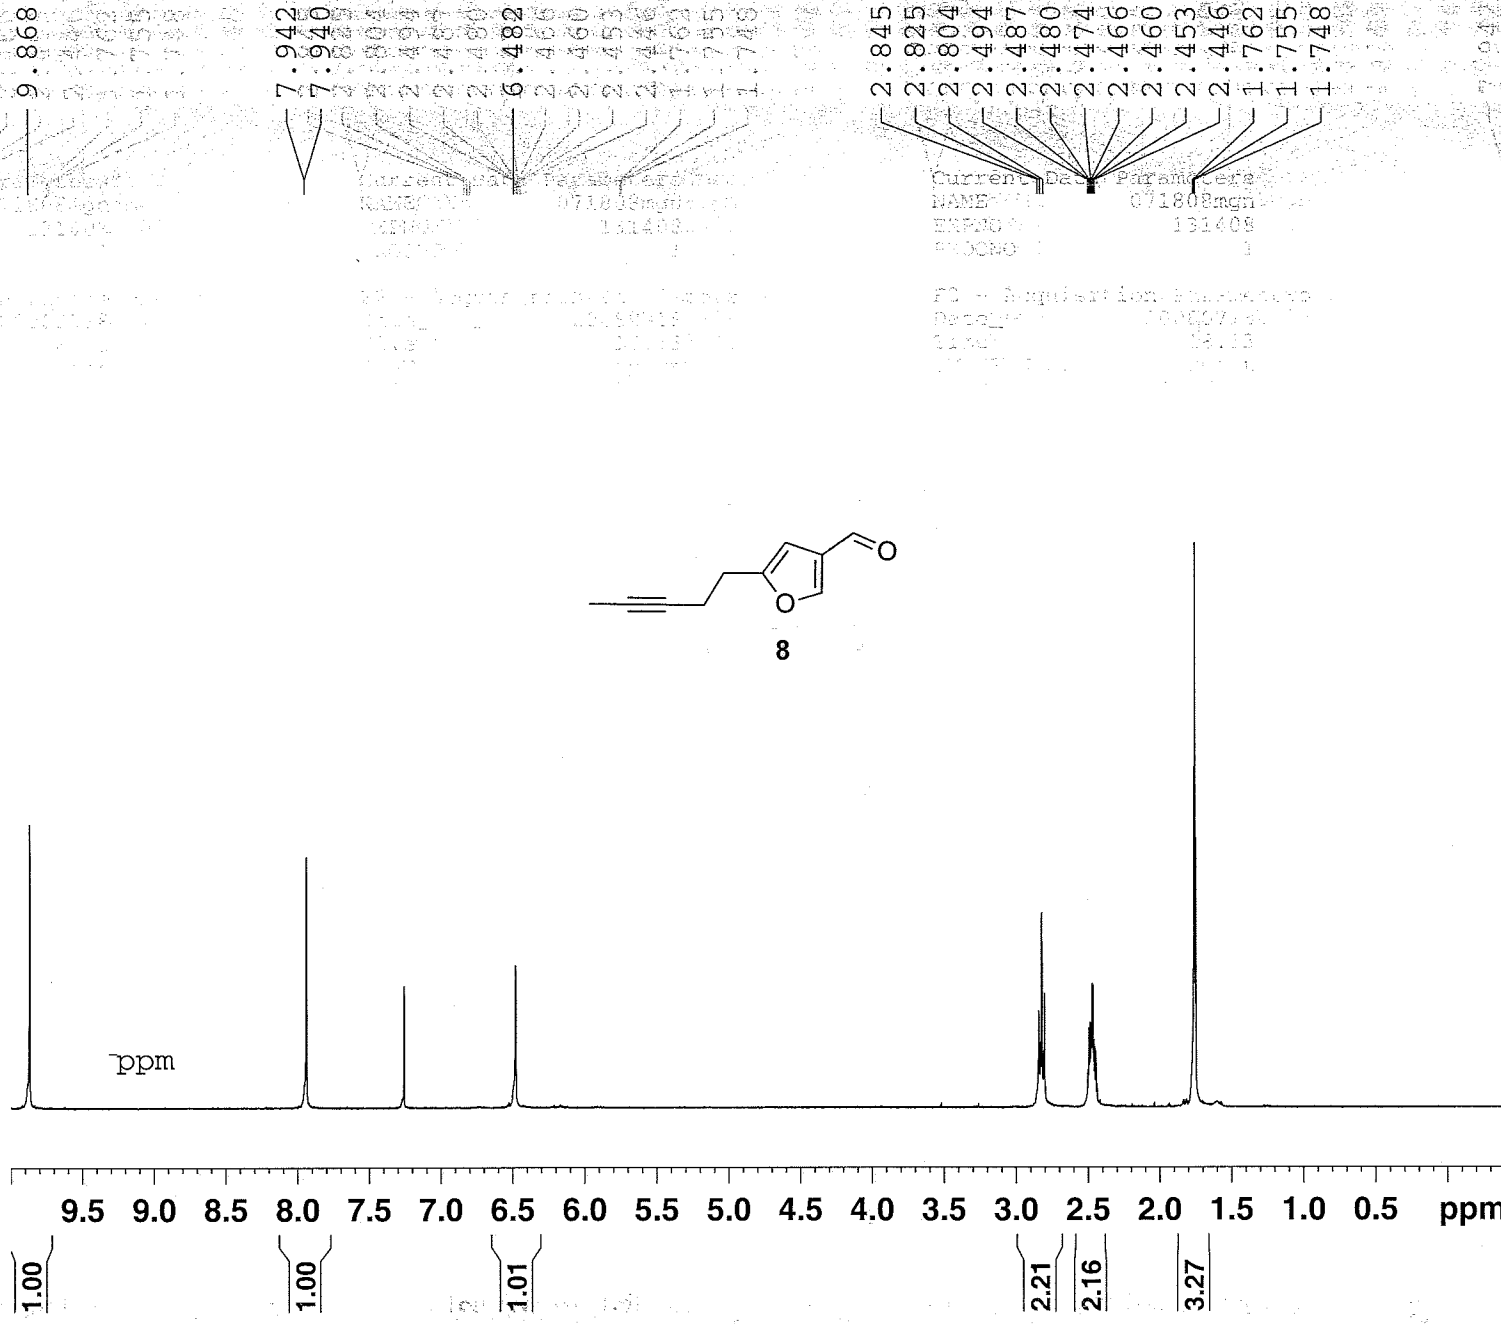

Current Data Parameters  
 NAME 071808mgn  
 EXPNO 131408  
 PROCNO 1

Current Data Parameters  
 NAME 071808mgn  
 EXPNO 131408  
 PROCNO 1

Current Data Parameters  
 NAME 071808mgn  
 EXPNO 131408  
 PROCNO 1

F2 - Acquisition Parameters  
 Date\_ 20080718  
 Time 18.13  
 INSTRUM spect  
 PROBHD 5 mm QNP 1H/15  
 PULPROG zg30  
 TD 65536  
 SOLVENT CDC13  
 NS 16  
 DS 2  
 SWH 7440.476 Hz  
 FIDRES 0.113533 Hz  
 AQ 4.4040694 sec  
 RG 812.7  
 DW 67.200 usec  
 DE 6.00 usec  
 TE 295.8 K  
 D1 1.00000000 sec  
 TD0 1

==== CHANNEL f1 =====  
 NUC1 1H  
 P1 14.93 usec  
 PL1 -3.00 dB  
 SFO1 360.1322240 MHz

F2 - Processing parameters  
 SI 32768  
 SF 360.1300135 MHz  
 WDW no  
 SSB 0  
 LB 0.00 Hz  
 GB 0  
 PC 1.00

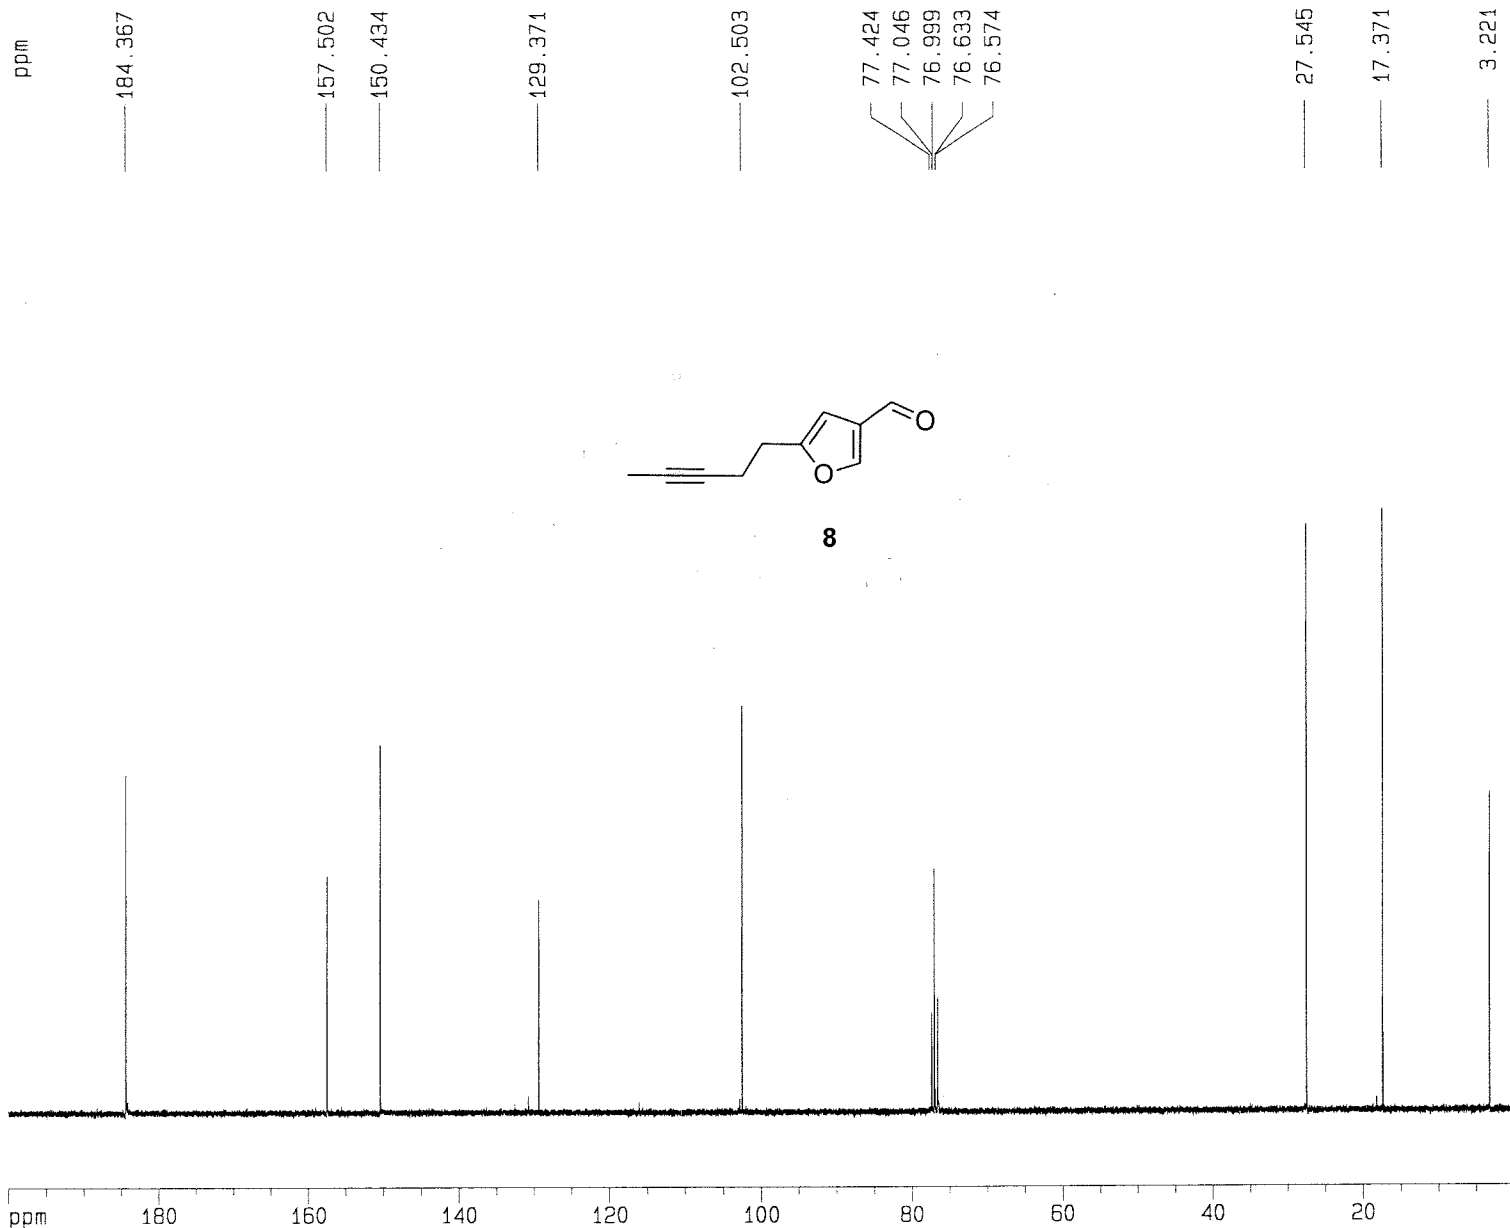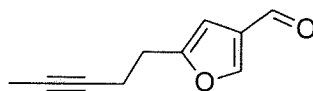

8

Current Data Parameters  
 NAME 071808mgm  
 EXPNO 131409  
 PROCNO 1

F2 - Acquisition Parameters

Date\_ 20080718  
 Time 18.57  
 INSTRUM spect  
 PROBHD 5 mm Multinu  
 PULPROG zgpg30  
 TD 65536  
 SOLVENT CDCl3  
 NS 510  
 DS 4  
 SWH 18832.393 Hz  
 FIDRES 0.287360 Hz  
 AQ 1.7400308 sec  
 RG 16384  
 DW 26.550 usec  
 DE 6.00 usec  
 TE 300.0 K  
 D1 2.0000000 sec  
 d11 0.03000000 sec  
 d12 0.00002000 sec

===== CHANNEL f1 =====  
 NUC1 13C  
 P1 11.80 usec  
 PL1 0.00 dB  
 SF01 75.4760200 MHz

===== CHANNEL f2 =====  
 CPDPRG2 waltz16  
 NUC2 1H  
 PCPD2 110.00 usec  
 PL2 0.00 dB  
 PL12 17.50 dB  
 PL13 17.50 dB  
 SF02 300.1312005 MHz

F2 - Processing parameters

SI 32768  
 SF 75.4677578 MHz  
 WDW nc  
 SSB 0  
 LB 0.00 Hz  
 GB 0  
 PC 1.40

1D NMR plot parameters

CX 20.00 cm  
 F1P 200.000 ppm  
 F1 15093.55 Hz  
 F2P 0.000 ppm  
 F2 0.00 Hz  
 PPMCM 10.00000 ppm/cm  
 HZCM 754.67761 Hz/cm

Hz

3033.83  
3006.38  
3002.22  
2905.06  
2613.67  
2573.49  
2485.76  
1670.43  
1511.90  
1344.17  
1248.23  
1100.88  
1093.70  
966.33  
915.21  
878.37  
787.64  
701.46  
687.95  
586.79  
580.04  
500.33  
413.41

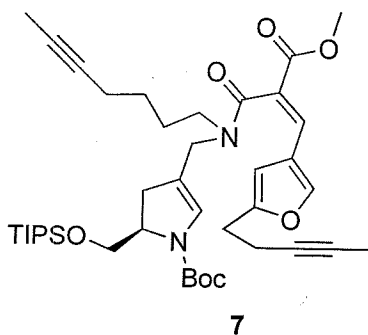

Integral

1.943  
2.000  
0.401  
9.352  
1.359  
3.699  
3.474  
1.452  
1.680  
8.775  
12.320  
1.743  
22.377

ppm

8

6

4

S-22

2

0

Current Data Parameters  
NAME 072208mg  
EXPNO 131508  
PROCNO 1

F2 - Acquisition Parameters  
Date\_ 20080722  
Time 15.54  
INSTRUM spect  
PROBHD 5 mm BBI 1H-B  
PULPROG zg30  
TD 65536  
SOLVENT CDC13  
NS 16  
DS 2  
SWH 8278.146 Hz  
FIDRES 0.126314 Hz  
AQ 3.9584243 sec  
RG 80.6  
DW 60.400 usec  
DE 6.00 usec  
TE 300.0 K  
D1 1.00000000 sec

===== CHANNEL f1 =====  
NUC1 1H  
P1 6.45 usec  
PL1 0.00 dB  
SFO1 400.1324710 MHz

F2 - Processing parameters  
SI 32768  
SF 400.1300084 MHz  
WDW no  
SSB 0  
LB 0.00 Hz  
GB 0  
PC 1.00

1D NMR plot parameters  
CX 20.00 cm  
F1P 10.000 ppm  
F1 4001.30 Hz  
F2P -0.500 ppm  
F2 -200.07 Hz  
PPMCM 0.52500 ppm/cm  
HZCM 210.06825 Hz/cm

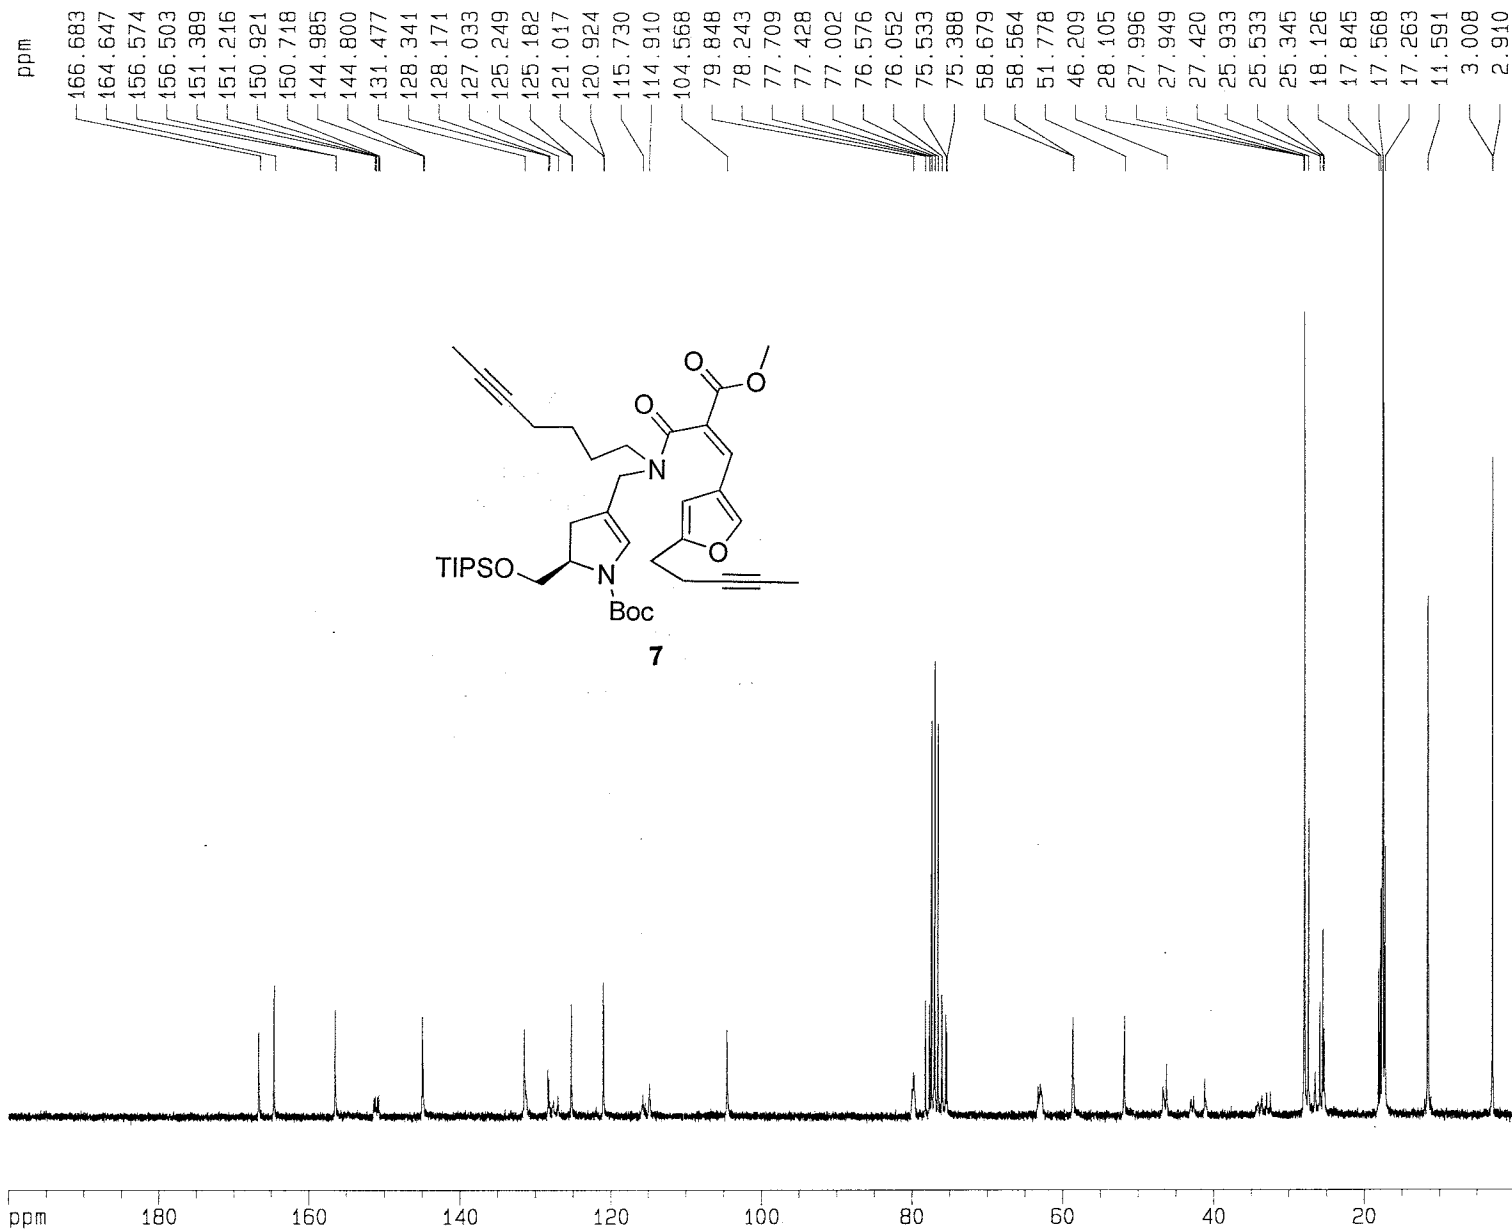

Current Data Parameters  
 NAME 072808mgn  
 EXPNO 131513  
 PROCNO 1

F2 - Acquisition Parameters  
 Date\_ 20080728  
 Time 20.07  
 INSTRUM spect  
 PROBHD 5 mm Multinu  
 PULPROG zgpg30  
 TD 24576  
 SOLVENT CDCl3  
 NS 3072  
 DS 4  
 SWH 18832.393 Hz  
 FIDRES 0.766292 Hz  
 AQ 0.6525428 sec  
 RG 8192  
 DW 26.550 usec  
 DE 6.00 usec  
 TE 300.0 K  
 D1 2.00000000 sec  
 d11 0.03000000 sec  
 d12 0.00002000 sec

===== CHANNEL f1 =====  
 NUC1 13C  
 P1 11.80 usec  
 PL1 0.00 dB  
 SF01 75.4760200 MHz

===== CHANNEL f2 =====  
 CPDPRG2 waltz16  
 NUC2 1H  
 PCPD2 110.00 usec  
 PL2 0.00 dB  
 PL12 17.50 dB  
 PL13 17.50 dB  
 SF02 300.1312005 MHz

F2 - Processing parameters  
 SI 32768  
 SF 75.4677675 MHz  
 WDW no  
 SSB 0  
 LB 0.00 Hz  
 GB 0  
 PC 1.40

1D NMR plot parameters  
 CX 20.00 cm  
 F1P 200.000 ppm  
 F1 15093.55 Hz  
 F2P 0.000 ppm  
 F2 0.00 Hz  
 PPMCM 10.00000 ppm/cm  
 HZCM 754.67767 Hz/cm

Hz

Integral

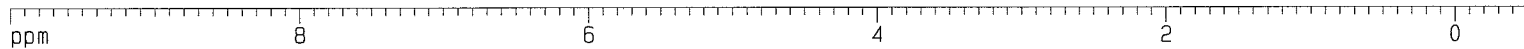

2905.04

2325.72  
1884.17  
1671.42  
1604.94  
1528.28  
1416.66  
1360.10  
1327.85  
1321.01  
1111.58  
1104.20  
1096.67  
967.33  
893.25  
852.30  
706.86  
704.31  
701.82  
639.61  
636.05  
605.74  
590.98  
578.57  
573.95  
566.88  
451.36  
448.04  
442.39  
434.44  
429.93  
413.06

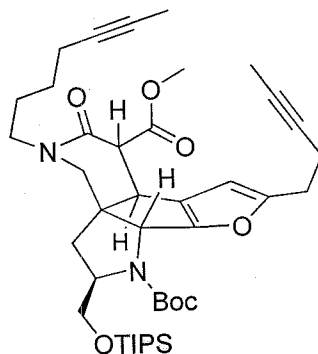

5

0.902  
1.000  
0.884  
1.472  
4.322  
2.476  
2.600  
1.588  
2.264  
2.551  
2.796  
2.140  
2.748  
8.198  
3.695  
14.714  
28.433

Current Data Parameters  
NAME 072908mgn  
EXPNO 132008  
PROCNO 1

F2 - Acquisition Parameters  
Date\_ 20080729  
Time 10.11  
INSTRUM spect  
PROBHD 5 mm BBI 1H-B  
PULPROG zg30  
TD 65536  
SOLVENT CDC13  
NS 16  
DS 2  
SWH 8278.146 Hz  
FIDRES 0.126314 Hz  
AQ 3.9584243 sec  
RG 512  
DW 60.400 usec  
DE 6.00 usec  
TE 300.0 K  
D1 1.00000000 sec

----- CHANNEL f1 -----  
NUC1 1H  
P1 6.45 usec  
PL1 0.00 dB  
SFO1 400.1324710 MHz

F2 - Processing parameters  
SI 32768  
SF 400.1300089 MHz  
WDW no  
SSB 0  
LB 0.00 Hz  
GB 0  
PC 1.00

1D NMR plot parameters  
CX 20.00 cm  
F1P 10.000 ppm  
F1 4001.30 Hz  
F2P -0.500 ppm  
F2 -200.07 Hz  
PPMCM 0.52500 ppm/cm  
HZCM 210.06825 Hz/cm





Hz

2905.05

2350.65  
1876.30  
1656.74  
1598.00  
1491.35  
1419.73  
1409.39  
1204.20  
1113.24  
1105.79  
1098.19  
969.56  
874.52  
867.69  
853.41  
851.14  
707.99  
705.39  
703.96  
701.39  
630.80  
624.40  
605.30  
566.29  
559.22  
552.54  
451.71  
448.42  
443.02  
434.91  
430.59

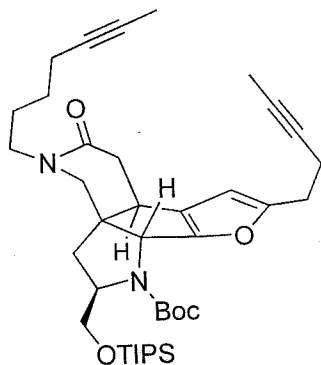

16

Integral

1.021  
1.000  
0.900  
1.257  
1.060  
3.415  
1.164  
1.091  
2.176  
1.155  
2.240  
1.289  
4.276  
6.926  
12.620  
2.602  
24.129

ppm

8

6

4

2

0

S-26

Current Data Parameters

NAME 072908mgn  
EXPNO 132208  
PROCNO 1

F2 - Acquisition Parameters

Date\_ 20080729  
Time 12.56  
INSTRUM spect  
PROBHD 5 mm BBI 1H-B  
PULPROG zg30  
TD 65536  
SOLVENT CDC13  
NS 16  
DS 2  
SWH 8278.146 Hz  
FIDRES 0.126314 Hz  
AQ 3.9584243 sec  
RG 362  
DW 60.400 usec  
DE 6.00 usec  
TE 300.0 K  
D1 1.00000000 sec

===== CHANNEL f1 =====

NUC1 1H  
P1 6.45 usec  
PL1 0.00 dB  
SF01 400.1324710 MHz

F2 - Processing parameters

SI 32768  
SF 400.1300089 MHz  
WDW no  
SSB 0  
LB 0.00 Hz  
GB 0  
PC 1.00

1D NMR plot parameters

CX 20.00 cm  
F1P 10.000 ppm  
F1 4001.30 Hz  
F2P -0.500 ppm  
F2 -200.07 Hz  
PPMCM 0.52500 ppm/cm  
HZCM 210.06825 Hz/cm

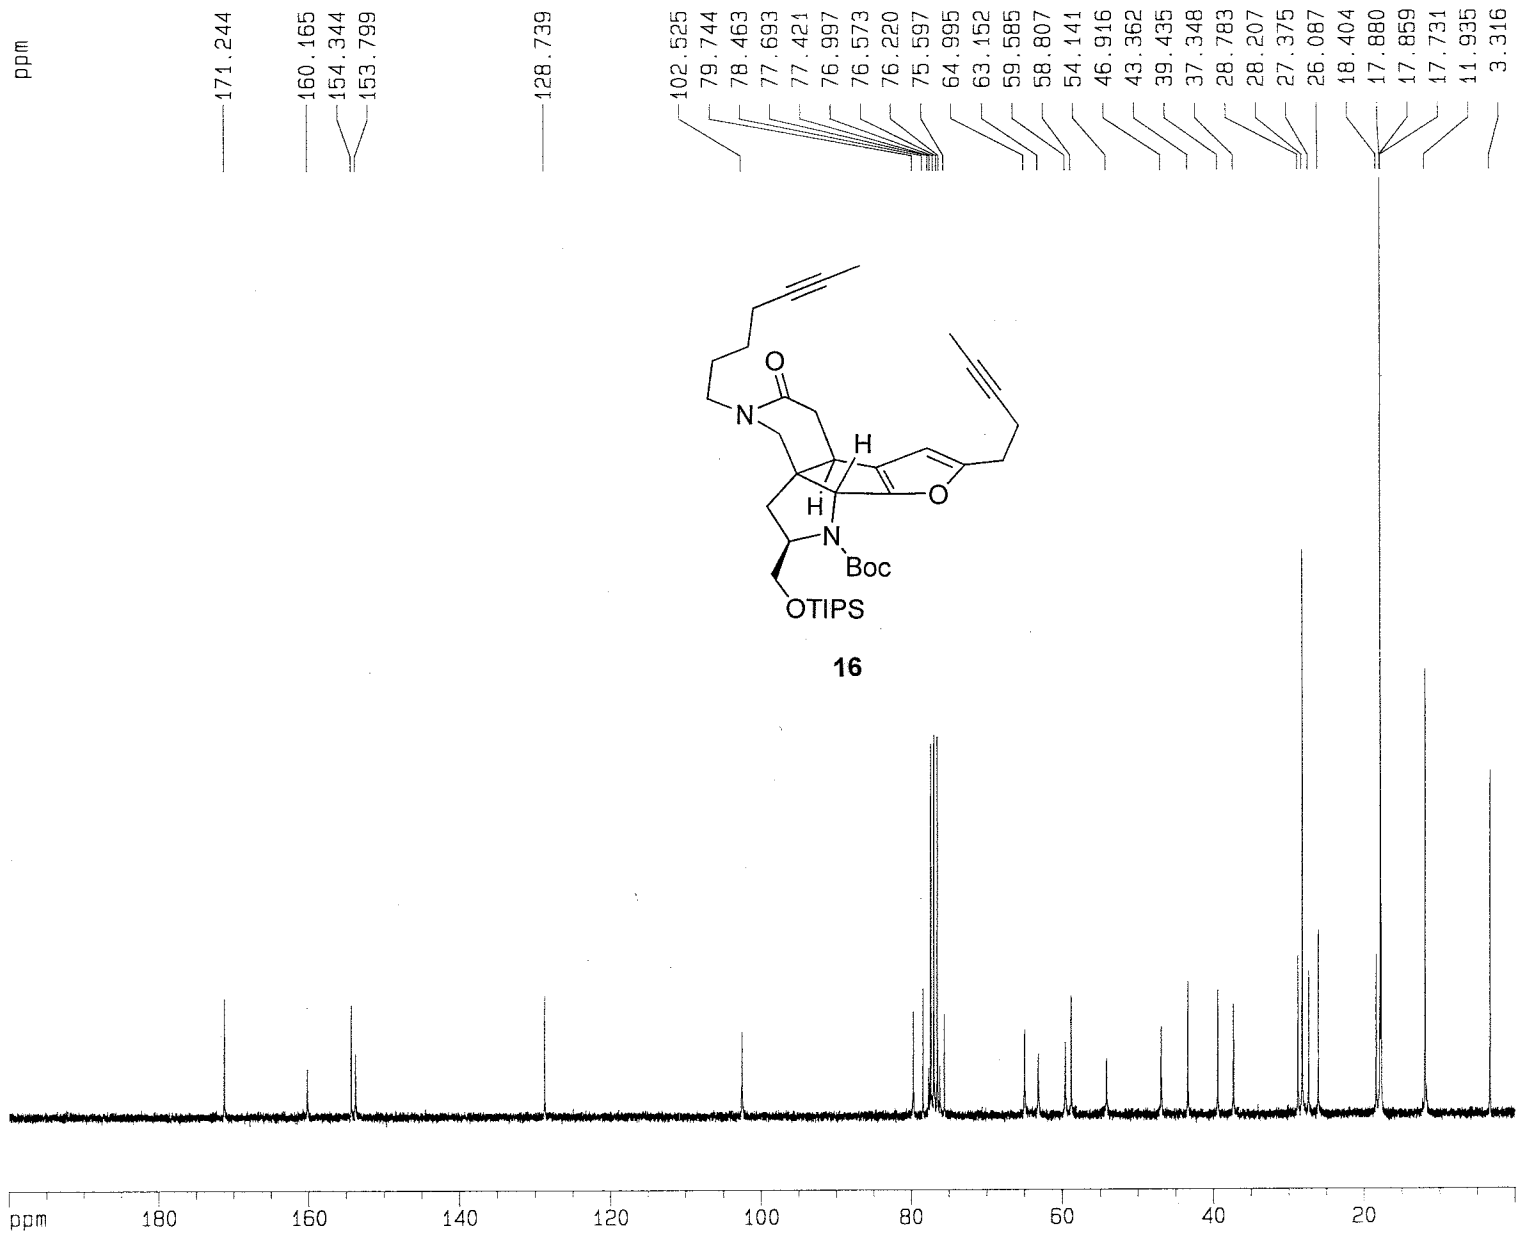

Current Data Parameters  
 NAME 072908mgn  
 EXPNO 132213  
 PROCNO 1

F2 - Acquisition Parameters  
 Date\_ 20080729  
 Time 19.57  
 INSTRUM spect  
 PROBHD 5 mm Multinu  
 PULPROG zgpg30  
 TD 24576  
 SOLVENT CDC13  
 NS 2048  
 DS 4  
 SWH 18832.393 Hz  
 FIDRES 0.766292 Hz  
 AQ 0.6525428 sec  
 RG 16384  
 DW 26.550 usec  
 DE 6.00 usec  
 TE 300.0 K  
 D1 2.0000000 sec  
 d11 0.0300000 sec  
 d12 0.0000200 sec

===== CHANNEL f1 =====  
 NUC1 13C  
 P1 11.80 usec  
 PL1 0.00 dB  
 SF01 75.4760200 MHz

===== CHANNEL f2 =====  
 CPDPRG2 waltz16  
 NUC2 1H  
 PCPD2 110.00 usec  
 PL2 0.00 dB  
 PL12 17.50 dB  
 PL13 17.50 dB  
 SF02 300.1312005 MHz

F2 - Processing parameters  
 SI 32768  
 SF 75.4677578 MHz  
 WDW no  
 SSB 0  
 LB 0.00 Hz  
 GB 0  
 PC 1.40

1D NMR plot parameters  
 CX 20.00 cm  
 F1P 200.000 ppm  
 F1 15093.55 Hz  
 F2P 0.000 ppm  
 F2 0.00 Hz  
 PPMCM 10.00000 ppm/cm  
 HZCM 754.67761 Hz/cm

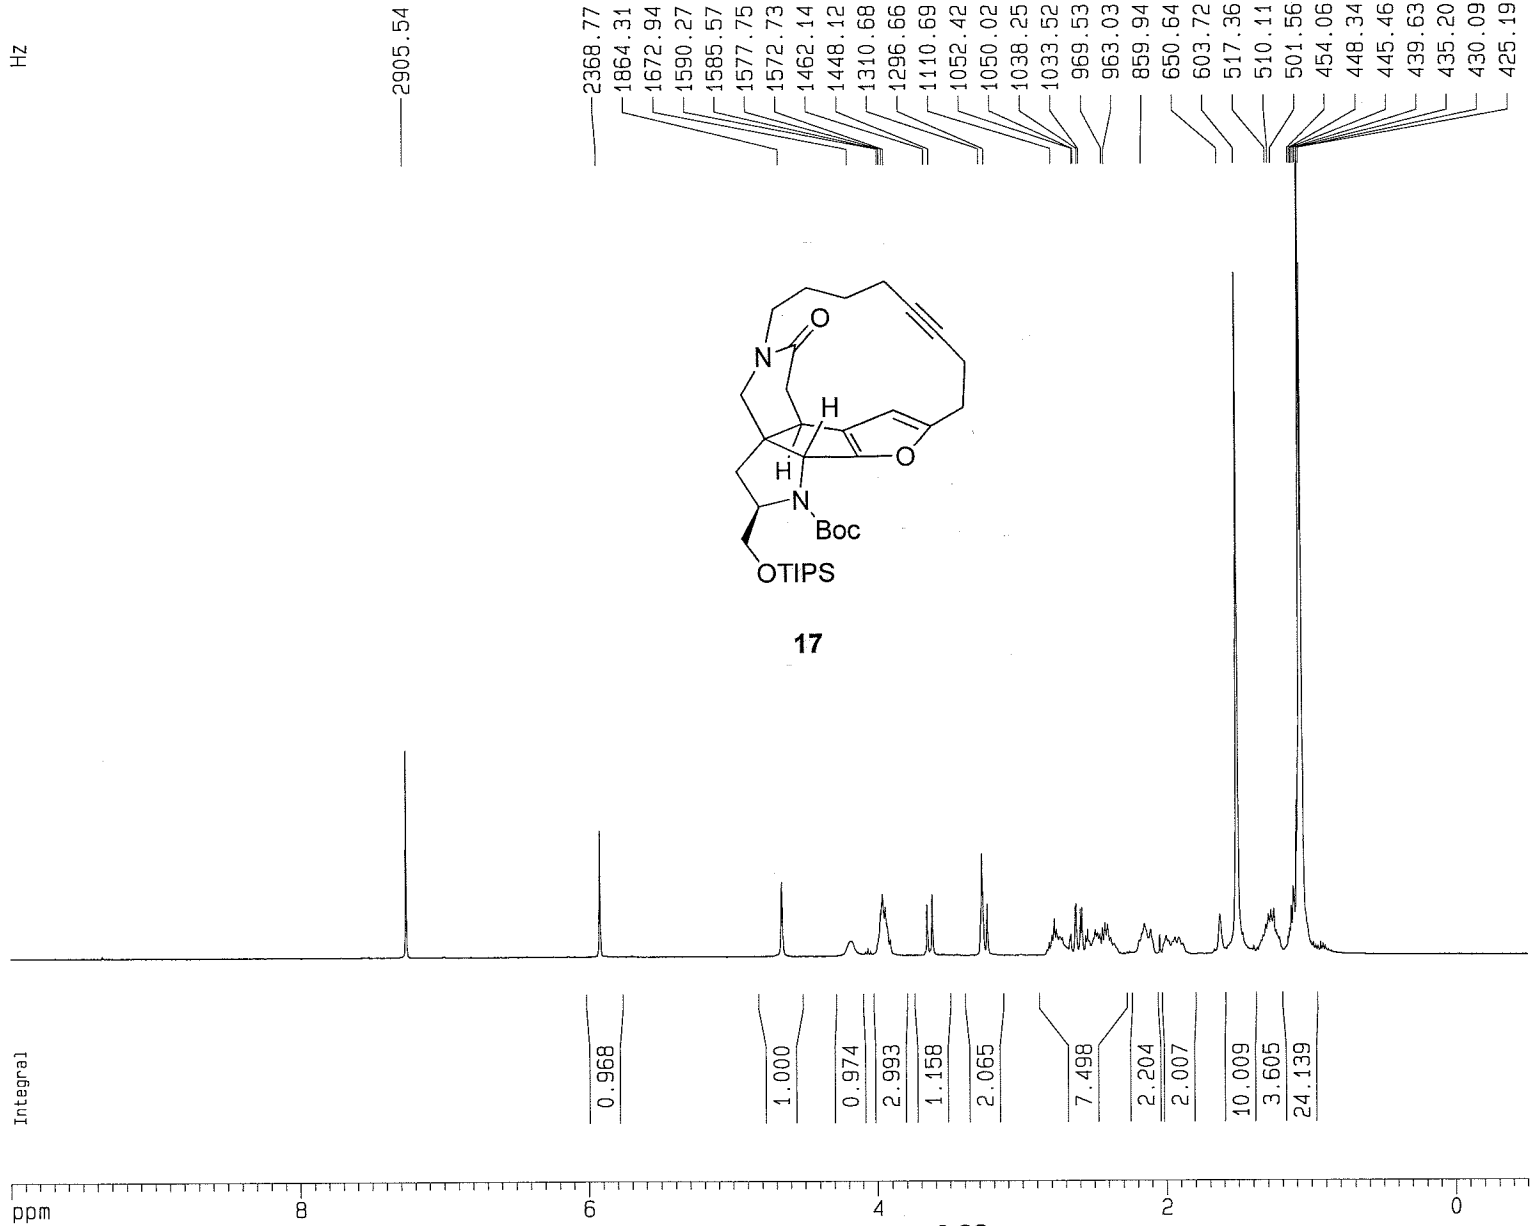

Current Data Parameters  
 NAME 080108mgn  
 EXPNO 132708  
 PROCNO 1

F2 - Acquisition Parameters  
 Date\_ 20080801  
 Time 10.57  
 INSTRUM spect  
 PROBHD 5 mm BBI 1H-B  
 PULPROG zg30  
 TD 65536  
 SOLVENT CDC13  
 NS 16  
 DS 2  
 SWH 8278.146 Hz  
 FIDRES 0.126314 Hz  
 AQ 3.9584243 sec  
 RG 228.1  
 DW 60.400 usec  
 DE 6.00 usec  
 TE 300.0 K  
 D1 1.00000000 sec

===== CHANNEL f1 =====  
 NUC1 1H  
 P1 6.45 usec  
 PL1 0.00 dB  
 SF01 400.1324710 MHz

F2 - Processing parameters  
 SI 32768  
 SF 400.1300086 MHz  
 WDW no  
 SSB 0  
 LB 0.00 Hz  
 GB 0  
 PC 1.00

1D NMR plot parameters  
 CX 20.00 cm  
 F1P 10.000 ppm  
 F1 4001.30 Hz  
 F2P -0.500 ppm  
 F2 -200.07 Hz  
 PPMCM 0.52500 ppm/cm  
 HZCM 210.06825 Hz/cm

Current Data Parameters  
 NAME 080108mg  
 EXPNO 132713  
 PROCNO 1

F2 - Acquisition Parameters  
 Date\_ 20080801  
 Time 18.58  
 INSTRUM spect  
 PROBHD 5 mm Multinu  
 PULPROG zgpg30  
 TD 24576  
 SOLVENT CDCl3  
 NS 2048  
 DS 4  
 SWH 18632.393 Hz  
 FIDRES 0.766292 Hz  
 AQ 0.6525428 sec  
 RG 32768  
 DW 26.550 usec  
 DE 6.00 usec  
 TE 300.0 K  
 D1 2.00000000 sec  
 d11 0.03000000 sec  
 d12 0.00002000 sec

==== CHANNEL f1 =====  
 NUC1 13C  
 P1 11.80 usec  
 PL1 0.00 dB  
 SF01 75.4760200 MHz

==== CHANNEL f2 =====  
 CPDPRG2 waitz16  
 NUC2 1H  
 PCPD2 110.00 usec  
 PL2 0.00 dB  
 PL12 17.50 dB  
 PL13 17.50 dB  
 SF02 300.1312005 MHz

F2 - Processing parameters  
 SI 32768  
 SF 75.4677595 MHz  
 WDW no  
 SSB 0  
 LB 0.00 Hz  
 GB 0  
 PC 1.40

1D NMR plot parameters  
 CX 20.00 cm  
 F1p 200.000 ppm  
 F1 15093.55 Hz  
 F2p 0.000 ppm  
 F2 0.00 Hz  
 PPMCM 10.00000 ppm/cm  
 HZCM 754.67761 Hz/cm

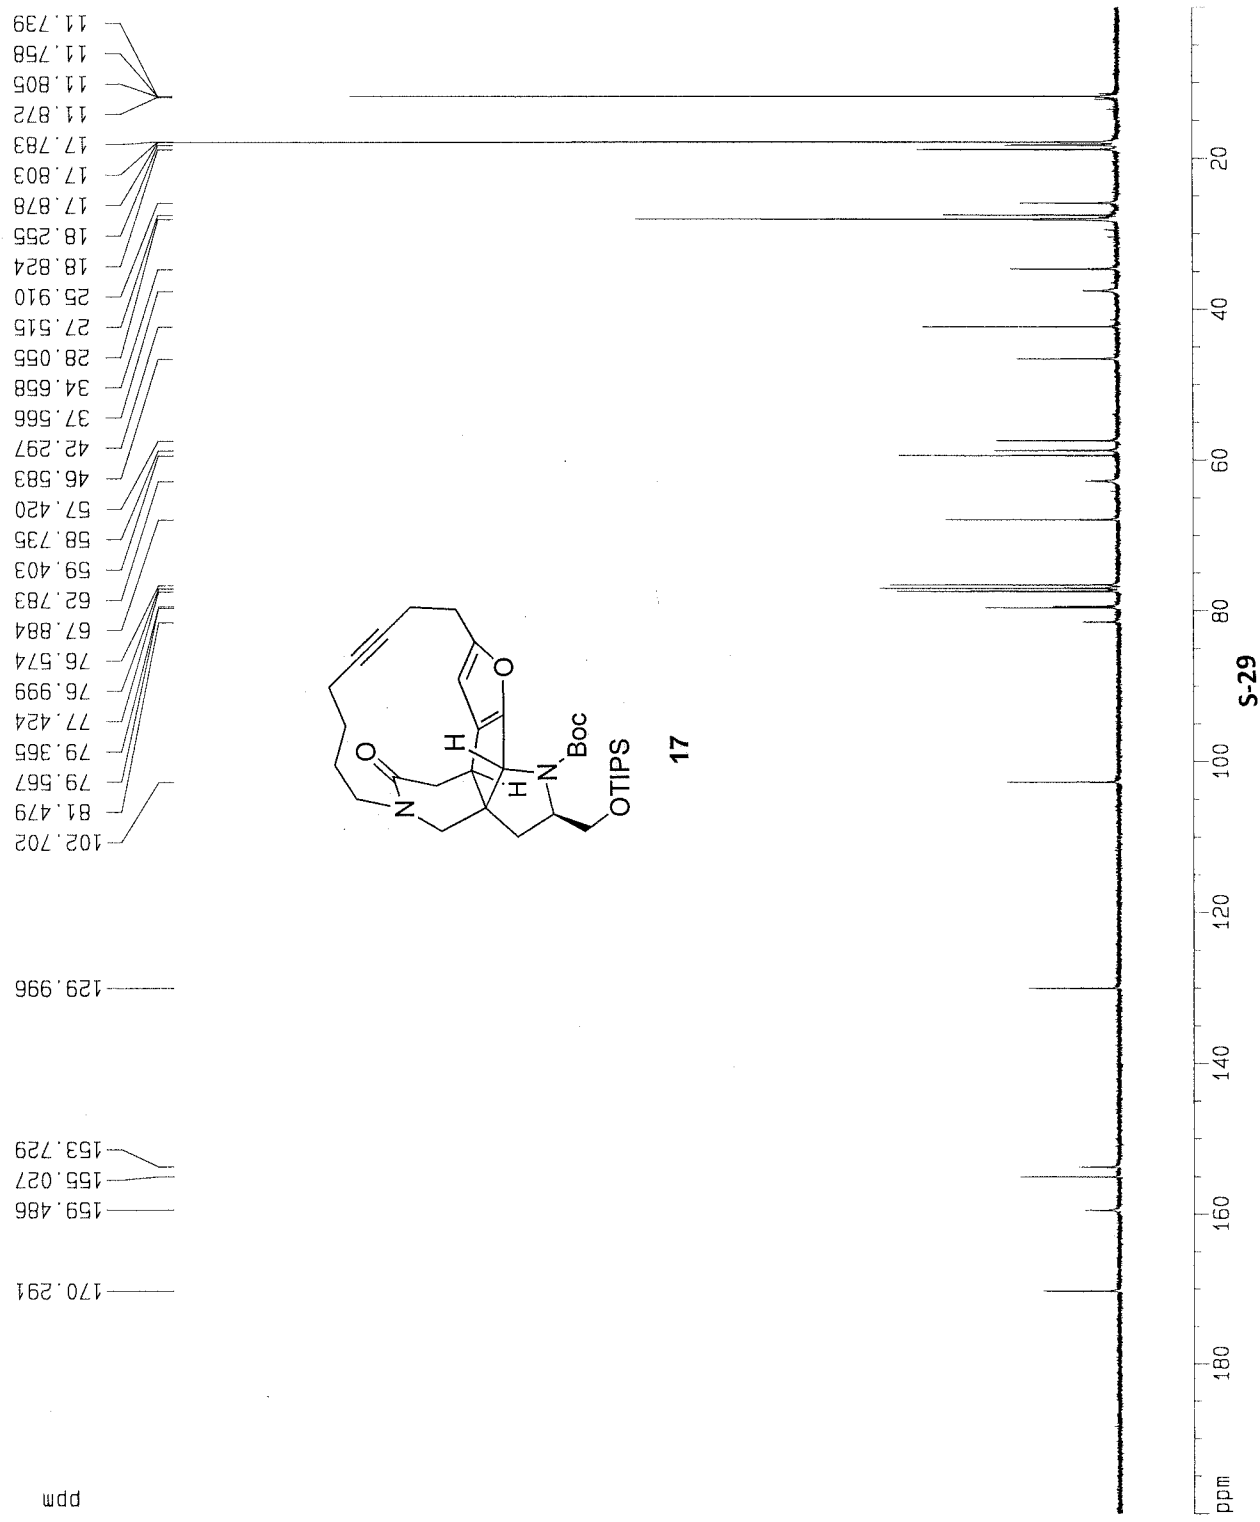

Hz

Integral

ppm

2904.92  
2378.04  
2334.59  
2184.51  
2174.87  
2142.89  
2138.42  
2127.41  
2106.16  
1897.49  
1615.87  
1500.14  
1479.58  
1464.72  
1450.85  
1294.49  
1291.96  
1289.97  
1272.33  
1258.50  
1048.08  
1045.67  
1024.70  
1019.68  
1011.12  
1009.45  
997.45  
961.64  
789.13  
784.08  
776.50  
771.43  
627.46  
620.82  
571.00  
558.89  
546.21  
438.76

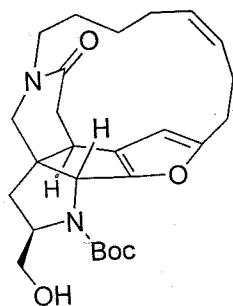

18

1.000  
1.014  
2.011  
1.046  
1.040  
1.136  
3.187  
1.005  
1.049  
2.149  
1.137  
2.141  
1.166  
1.060  
1.174  
1.062  
10.764  
2.165  
2.214  
0.879

Current Data Parameters  
NAME 081308mgn  
EXPNO 134208  
PROCNO 1

F2 - Acquisition Parameters  
Date\_ 20080813  
Time 10.59  
INSTRUM spect  
PROBHD 5 mm BBI 1H-B  
PULPROG zg30  
TD 65536  
SOLVENT CDC13  
NS 16  
DS 2  
SWH 8278.146 Hz  
FIDRES 0.126314 Hz  
AQ 3.9584243 sec  
RG 512  
DW 60.400 usec  
DE 6.00 usec  
TE 300.0 K  
D1 1.00000000 sec

===== CHANNEL f1 =====  
NUC1 1H  
P1 6.45 usec  
PL1 0.00 dB  
SF01 400.1324710 MHz

F2 - Processing parameters  
SI 32768  
SF 400.1300091 MHz  
WDW no  
SSB 0  
LB 0.00 Hz  
GB 0  
PC 1.00

1D NMR plot parameters  
CX 20.00 cm  
F1P 10.000 ppm  
F1 4001.30 Hz  
F2P -0.500 ppm  
F2 -200.07 Hz  
PPMCM 0.52500 ppm/cm  
HZCM 210.06825 Hz/cm

ppm

170.511  
170.486160.255  
155.292  
154.510132.170  
129.684  
129.659  
126.016103.485  
80.772  
77.319  
77.000  
76.681  
67.659  
64.777  
60.754  
57.550  
57.194  
46.734  
41.421  
38.118  
34.359  
30.339  
28.659  
28.427  
28.156  
28.135  
28.115  
28.094  
28.069  
28.044  
28.024  
28.003  
27.940  
27.553  
25.030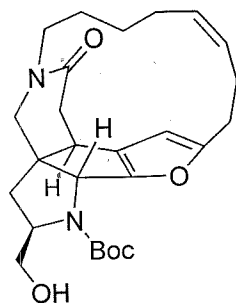

18

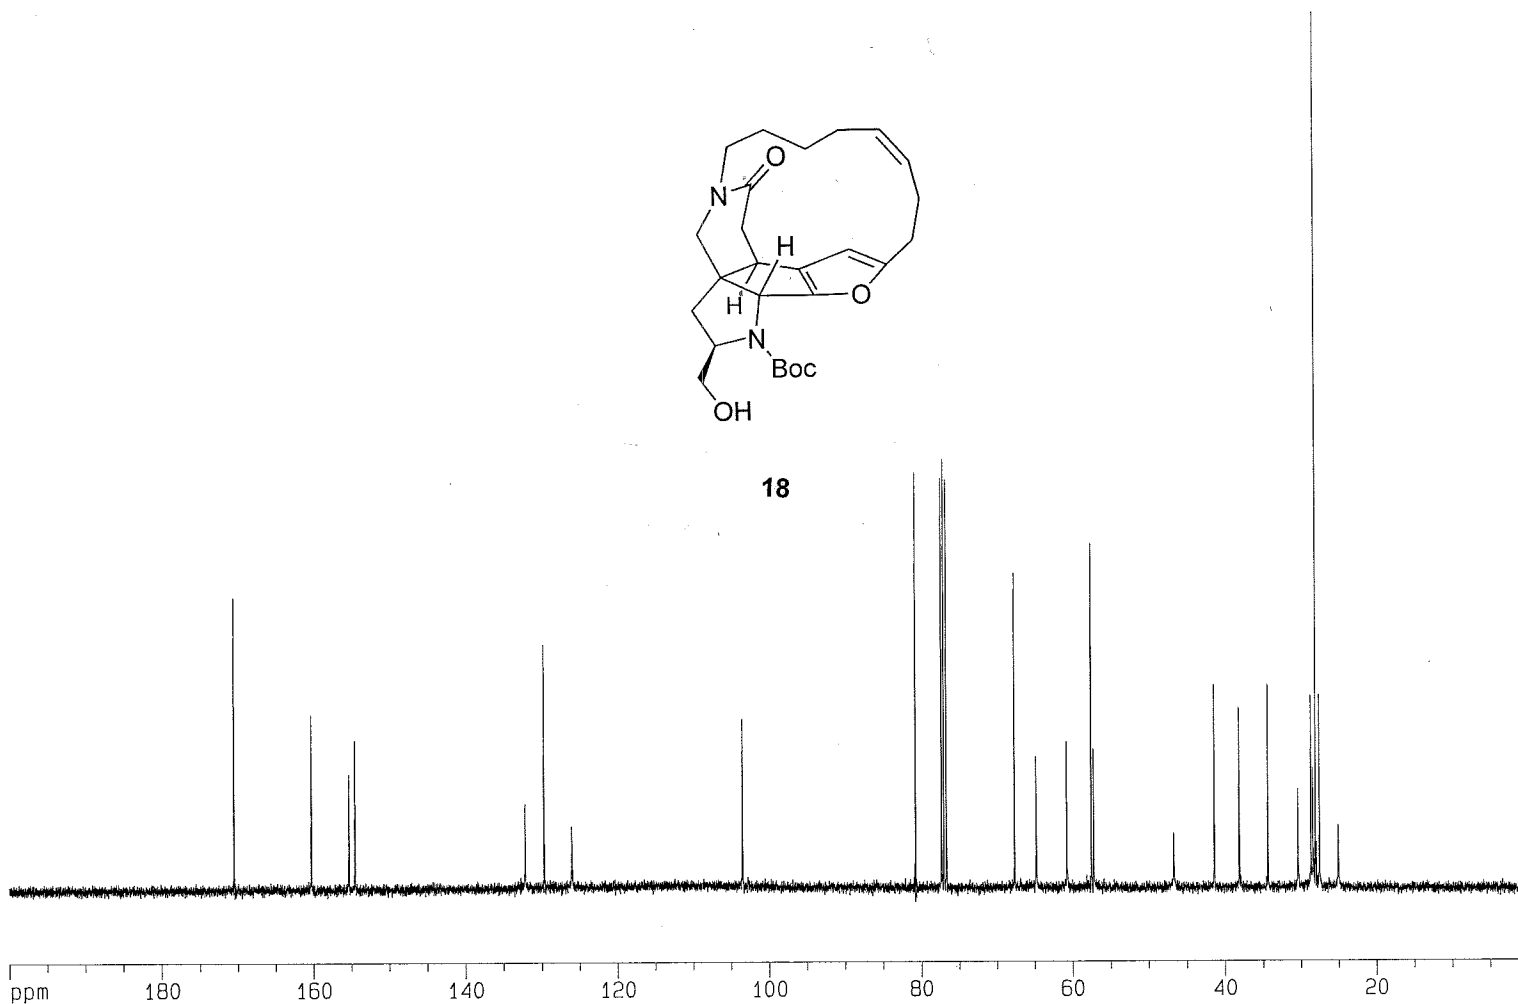

## Current Data Parameters

NAME 081308mgn  
EXPNO 134213  
PROCNO 1

## F2 - Acquisition Parameters

Date\_ 20080813  
Time 10.52  
INSTRUM spect  
PROBHD 5 mm BBI 1H-B  
PULPROG zgpg30  
TD 24576  
SOLVENT CDC13  
NS 2048  
DS 4  
SWH 25125.629 Hz  
FIDRES 1.022364 Hz  
AQ 0.4891124 sec  
RG 8192  
DW 19.900 usec  
DE 6.00 usec  
TE 300.0 K  
D1 2.0000000 sec  
d11 0.0300000 sec  
d12 0.0002000 sec

## ===== CHANNEL f1 =====

NUC1 13C  
P1 16.35 usec  
PL1 -6.00 dB  
SF01 100.6237959 MHz

## ===== CHANNEL f2 =====

CPDPRG2 waltz16  
NUC2 1H  
PCPD2 114.00 usec  
PL2 0.00 dB  
PL12 24.00 dB  
PL13 24.00 dB  
SF02 400.1316005 MHz

## F2 - Processing parameters

SI 32768  
SF 100.6127892 MHz  
WDW no  
SSB 0  
LB 0.00 Hz  
GB 0  
PC 1.40

## 1D NMR plot parameters

CX 20.00 cm  
F1P 200.000 ppm  
F1 20122.56 Hz  
F2P 0.000 ppm  
F2 0.00 Hz  
PPMCM 10.00000 ppm/cm  
HZCM 1006.12793 Hz/cm

Hz

2178.72  
2178.19  
2177.55  
2177.04  
2175.94  
2175.40  
1744.82  
1743.86  
1602.41  
1591.69  
1588.10  
1561.91  
1544.94  
1534.25  
1524.12  
1423.36  
1099.68  
1085.82  
979.46  
977.15  
975.23  
966.30  
952.44  
834.07  
783.80  
781.25  
768.07  
763.13  
760.22  
747.61  
746.50  
619.45  
613.94  
612.05  
606.55  
601.10  
477.15  
466.20  
459.54  
453.57  
431.35  
374.32  
293.56

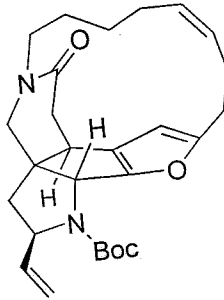

Integral

2.000  
4.257  
1.073  
0.955  
1.055  
1.033  
2.153  
2.136  
3.506  
1.316  
2.449  
1.304  
12.990  
5.141  
0.885

ppm

8

6

4

S-32

2

0

Current Data Parameters  
NAME 061808mgn  
EXPNO 12802  
PROCNO 1

F2 - Acquisition Parameters  
Date\_ 20080618  
Time 10.31  
INSTRUM spect  
PROBHD 5 mm GNP 1H/1  
PULPROG zg30  
TD 24576  
SOLVENT CDC13  
NS 16  
DS 2  
SWH 6172.839 Hz  
FIDRES 0.251173 Hz  
AQ 1.9907060 sec  
RG 362  
DW 81.000 usec  
DE 6.00 usec  
TE 300.0 K  
D1 1.00000000 sec

===== CHANNEL f1 =====  
NUC1 1H  
P1 11.70 usec  
PL1 0.00 dB  
SFO1 299.8718518 MHz

F2 - Processing parameters  
SI 32768  
SF 299.8700101 MHz  
WDW no  
SSB 0  
LB 0.00 Hz  
GB 0  
PC 1.00

1D NMR plot parameters  
CX 20.00 cm  
F1P 10.000 ppm  
F1 2998.70 Hz  
F2P -0.500 ppm  
F2 -149.93 Hz  
PPMCM 0.52500 ppm/cm  
HZCM 157.43175 Hz/cm



ppm

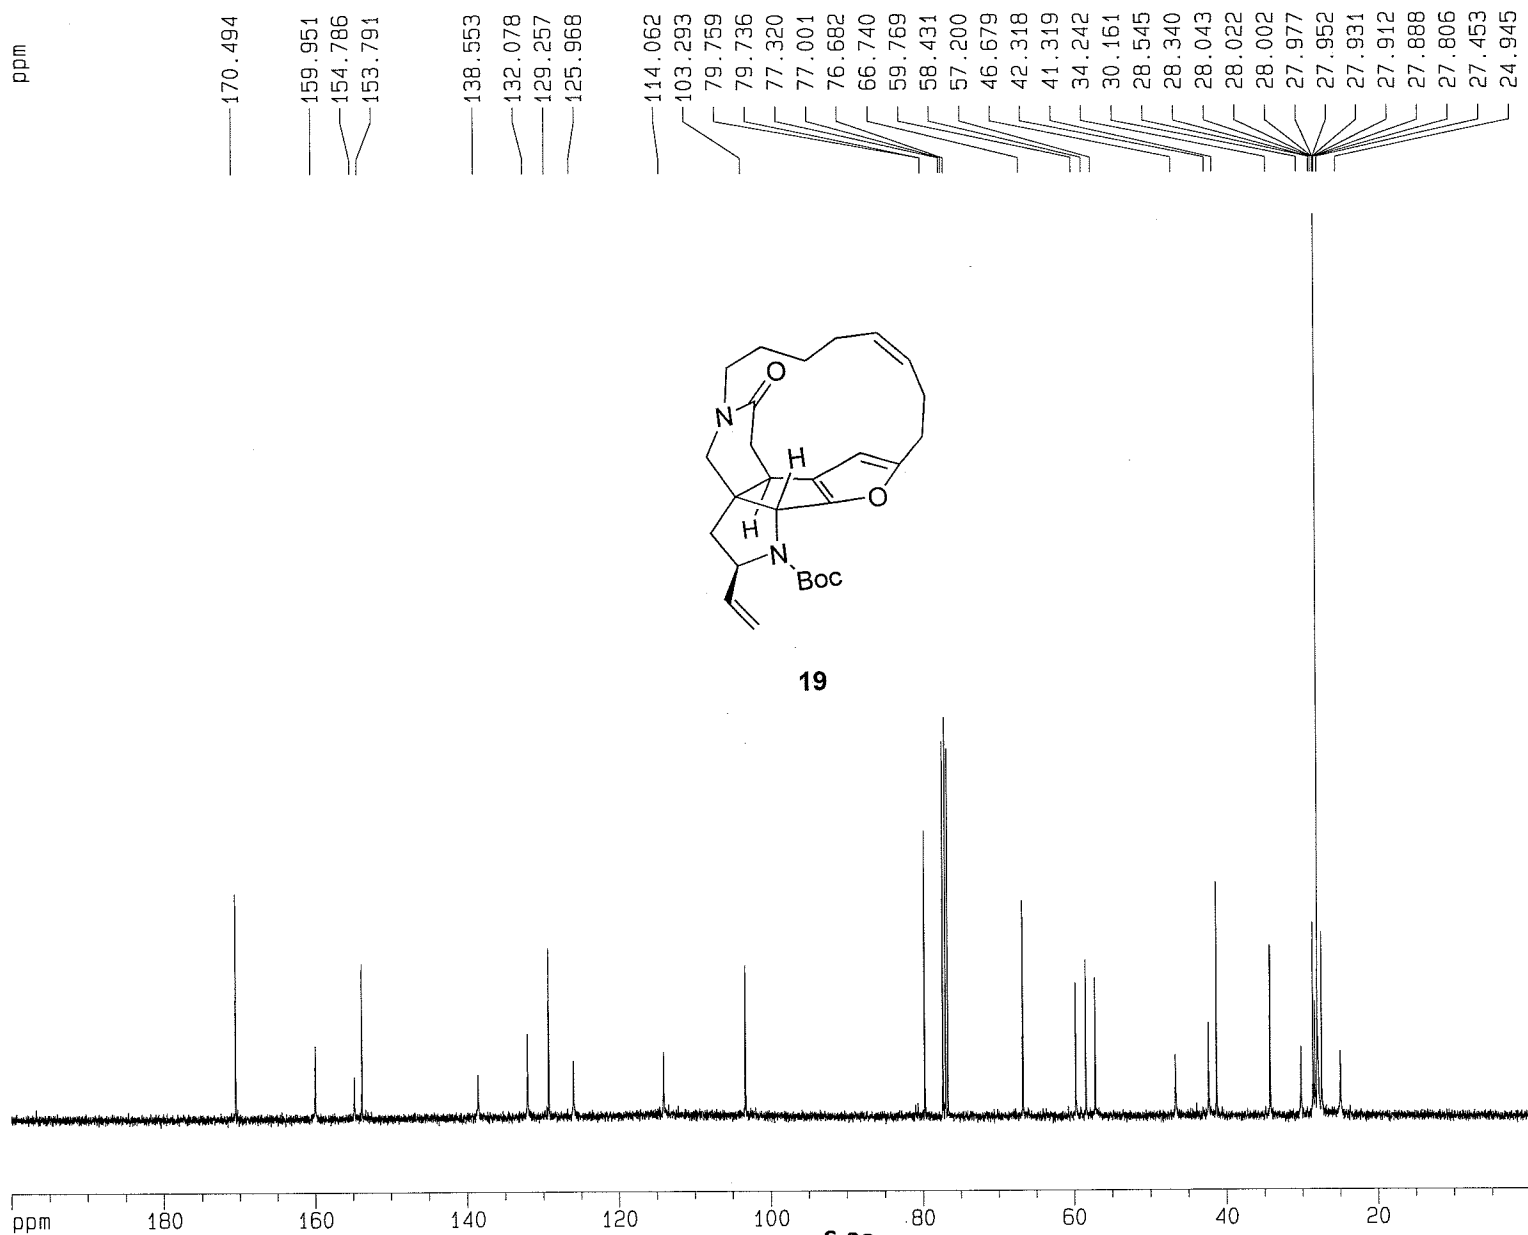

ppm

180

160

140

120

100

S-33

80

60

40

20

## Current Data Parameters

NAME 081808mg  
EXPNO 134513  
PROCNO 1

## F2 - Acquisition Parameters

Date\_ 20080818  
Time 11.54  
INSTRUM spect  
PROBHD 5 mm BBI 1H-8  
PULPROG zgpg30  
TD 24576  
SOLVENT CDCl3  
NS 2048  
DS 4  
SWH 25125.629 Hz  
FIDRES 1.022364 Hz  
AQ 0.4891124 sec  
RG 13004  
DW 19.900 usec  
DE 6.00 usec  
TE 300.0 K  
D1 2.0000000 sec  
d11 0.0300000 sec  
d12 0.0002000 sec

## ===== CHANNEL f1 =====

NUC1 13C  
P1 16.35 usec  
PL1 -6.00 dB  
SF01 100.6237959 MHz

## ===== CHANNEL f2 =====

CPDPRG2 waltz16  
NUC2 1H  
PCPD2 114.00 usec  
PL2 0.00 dB  
PL12 24.00 dB  
PL13 24.00 dB  
SF02 400.1316005 MHz

## F2 - Processing parameters

SI 32768  
SF 100.6127961 MHz  
WDW no  
SSB 0  
LB 0.00 Hz

PC 1.40

## 1D NMR plot parameters

CX 20.00 cm  
F1P 200.000 ppm  
F1 20122.56 Hz  
F2P 0.000 ppm  
F2 0.00 Hz  
PPMCM 10.00000 ppm/cm  
HZCM 1006.12793 Hz/cm

Hz

2905.00  
 2334.41  
 2327.14  
 2316.66  
 2091.60  
 2056.55  
 2039.29  
 2030.63  
 2025.00  
 2014.40  
 1999.96  
 1991.51  
 1922.53  
 1306.72  
 1295.21  
 1280.99  
 1062.67  
 1060.69  
 1047.00  
 1045.26  
 1018.17  
 1014.28  
 1004.32  
 998.17  
 863.72  
 828.33  
 820.91  
 815.57  
 810.41  
 797.54  
 791.75  
 724.09  
 716.53  
 709.37  
 630.72  
 618.77  
 494.63  
 411.47

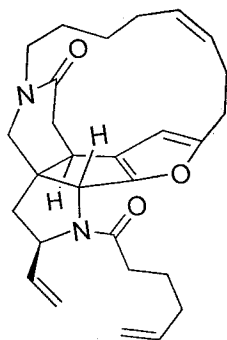

20

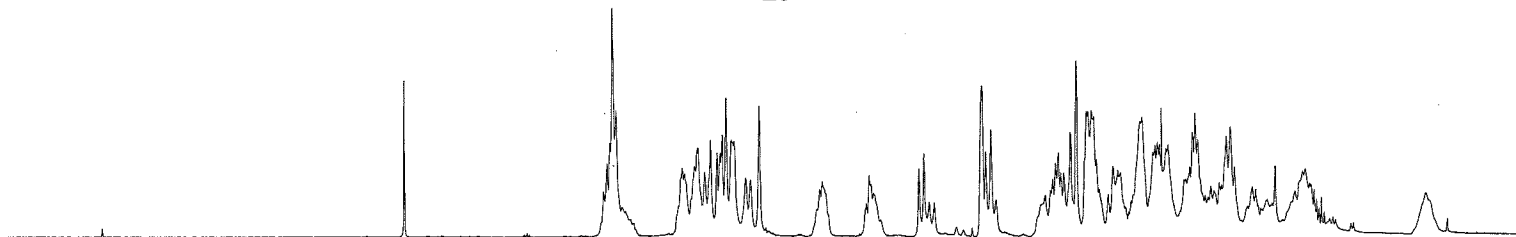

Integral

3.2037  
 7.6680  
 1.0000  
 1.1011  
 1.0505  
 2.1114  
 3.8204  
 2.9759  
 1.6655  
 5.6040  
 6.0334  
 2.1063  
 3.1499

8  
6  
4  
2  
0

S-34

Current Data Parameters  
 NAME 061908mgn  
 EXPNO 12852  
 PROCNO 1

F2 - Acquisition Parameters  
 Date\_ 20080619  
 Time 10.26  
 INSTRUM spect  
 PROBHD 5 mm BBI 1H-B  
 PULPROG zg30  
 TD 24576  
 SOLVENT CDC13  
 NS 16  
 DS 2  
 SWH 8278.146 Hz  
 FIDRES 0.336839 Hz  
 AQ 1.4844404 sec  
 RG 256  
 DW 60.400 usec  
 DE 6.00 usec  
 TE 300.0 K  
 D1 1.00000000 sec

===== CHANNEL f1 =====  
 NUC1 1H  
 P1 6.45 usec  
 PL1 0.00 dB  
 SFO1 400.1324710 MHz

F2 - Processing parameters  
 SI 32768  
 SF 400.1300091 MHz  
 WDW no  
 SSB 0  
 LB 0.00 Hz  
 GB 0  
 PC 1.00

1D NMR plot parameters  
 CX 20.00 cm  
 F1P 10.000 ppm  
 F1 4001.30 Hz  
 F2P -0.500 ppm  
 F2 -200.07 Hz  
 PPMCM 0.52500 ppm/cm  
 HZCM 210.06825 Hz/cm

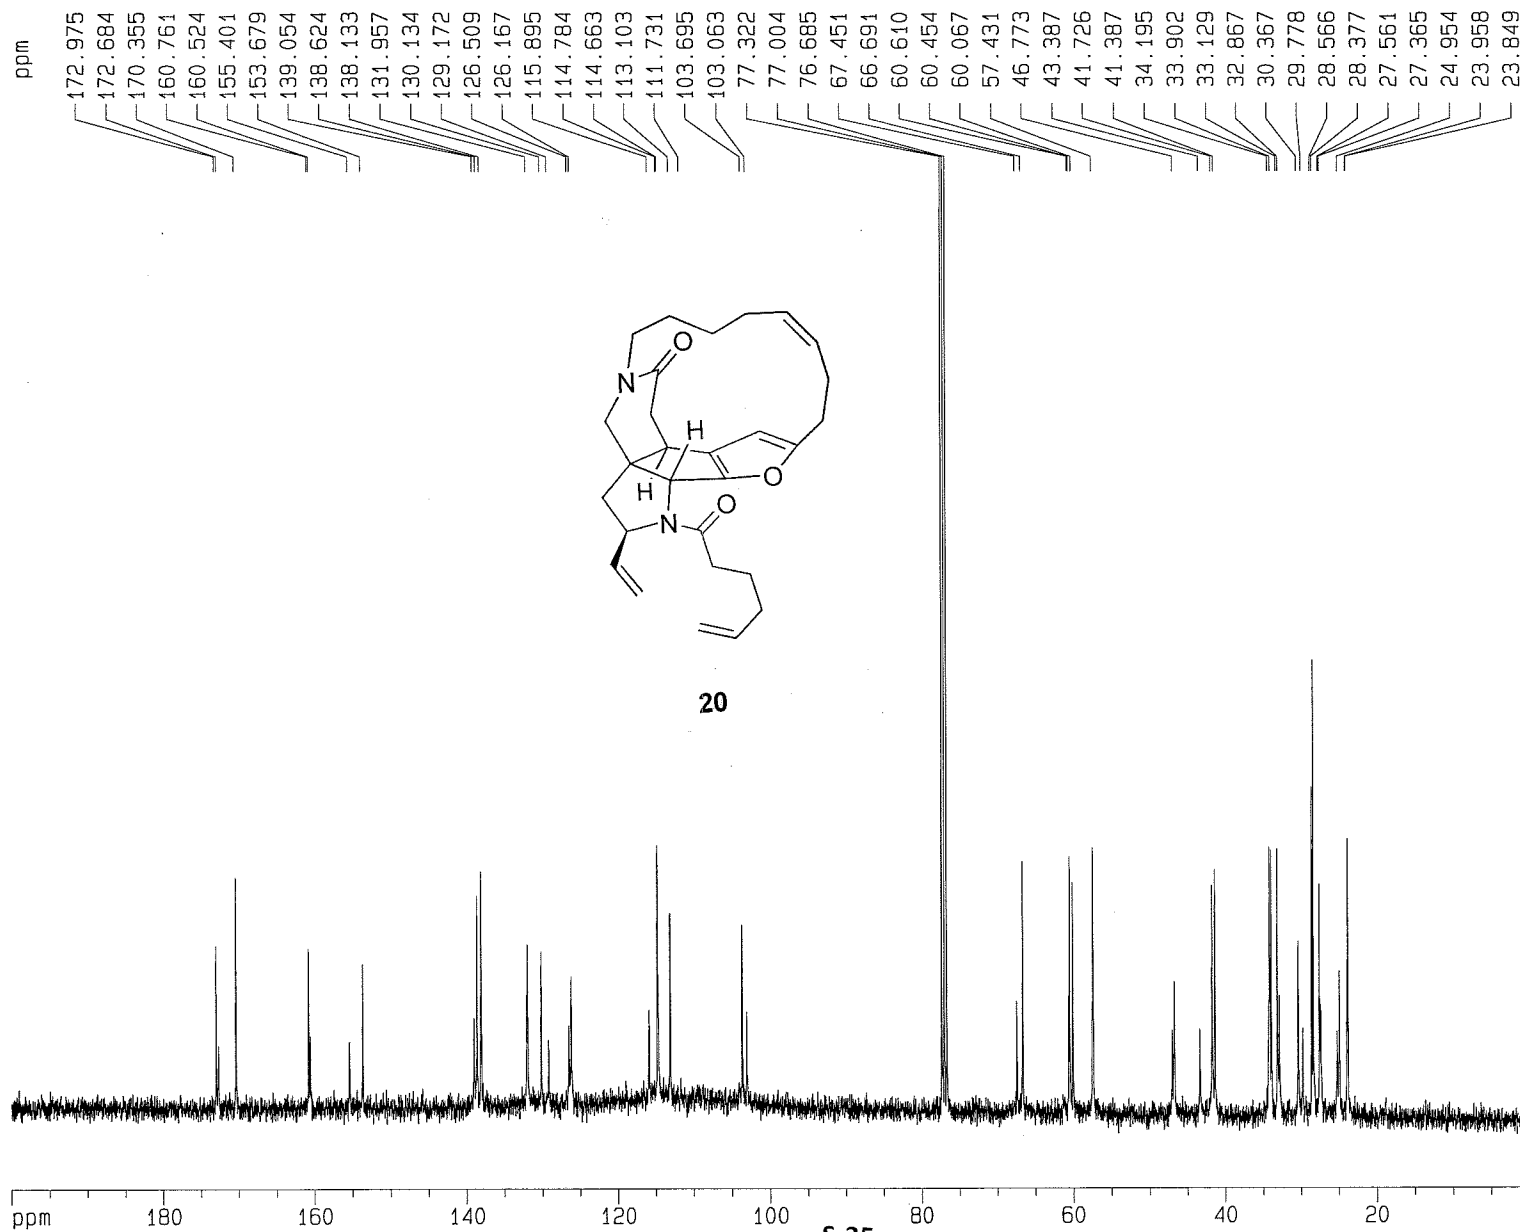

Current Data Parameters  
 NAME 081908mgn  
 EXPNO 135313  
 PROCNO 1

F2 - Acquisition Parameters  
 Date\_ 20080819  
 Time 12.15  
 INSTRUM spect  
 PROBHD 5 mm BBI 1H-B  
 PULPROG zgpg30  
 TD 24576  
 SOLVENT CDC13  
 NS 2048  
 DS 4  
 SWH 25125.629 Hz  
 FIDRES 1.022364 Hz  
 AQ 0.4891124 sec  
 RG 8192  
 DW 19.900 usec  
 DE 6.00 usec  
 TE 300.0 K  
 D1 2.00000000 sec  
 d11 0.03000000 sec  
 d12 0.00002000 sec

===== CHANNEL f1 =====  
 NUC1 13C  
 P1 16.35 usec  
 PL1 -6.00 dB  
 SF01 100.6237959 MHz

===== CHANNEL f2 =====  
 CPDPRG2 waltz16  
 NUC2 1H  
 PCPD2 114.00 usec  
 PL2 0.00 dB  
 PL12 24.00 dB  
 PL13 24.00 dB  
 SF02 400.1316005 MHz

F2 - Processing parameters  
 SI 32768  
 SF 100.6127899 MHz  
 WDW EM  
 SSB 0  
 LB 1.00 Hz  
 GB 0  
 PC 1.40

1D NMR plot parameters  
 CX 20.00 cm  
 F1P 200.000 ppm  
 F1 20122.56 Hz  
 F2P 0.000 ppm  
 F2 0.00 Hz  
 PPMCM 10.00000 ppm/cm  
 HZCM 1006.12793 Hz/cm

nakadomarin 1 1 /opt/topspin Benesi

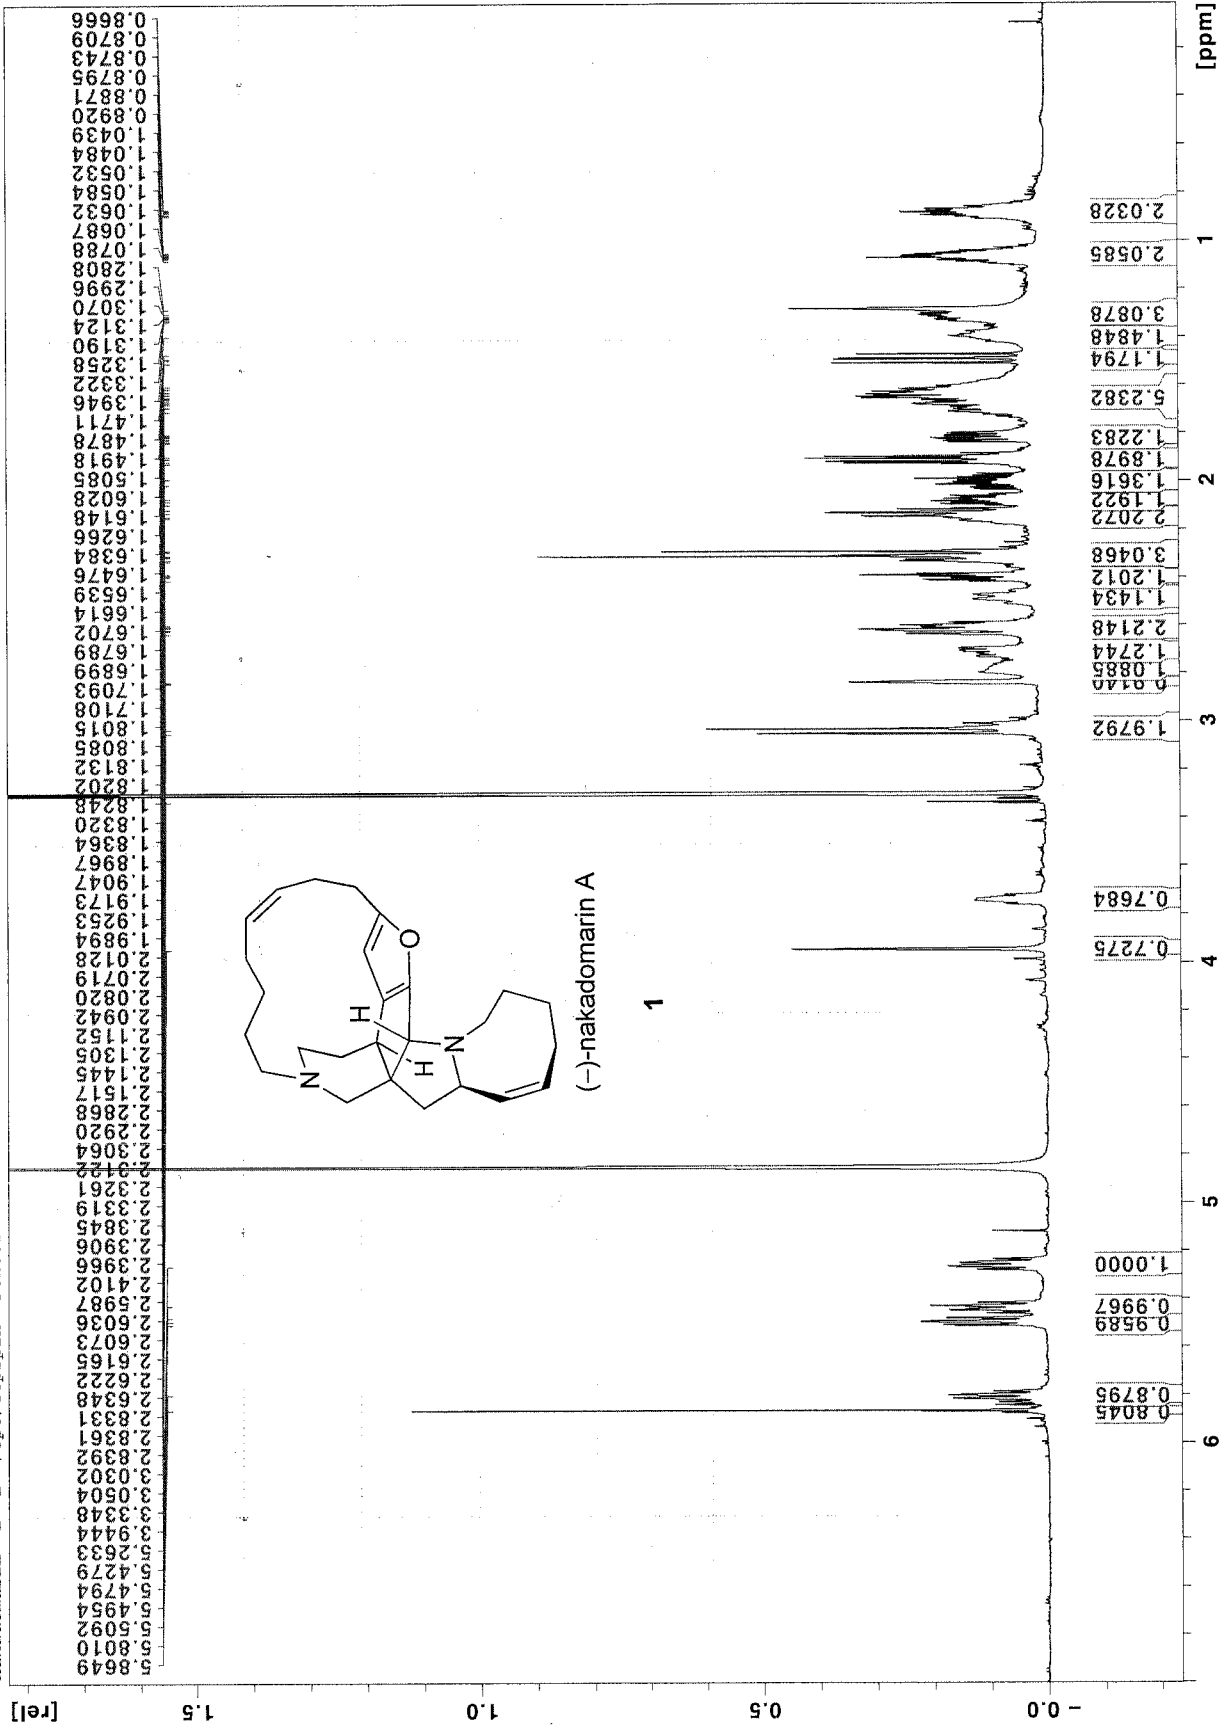

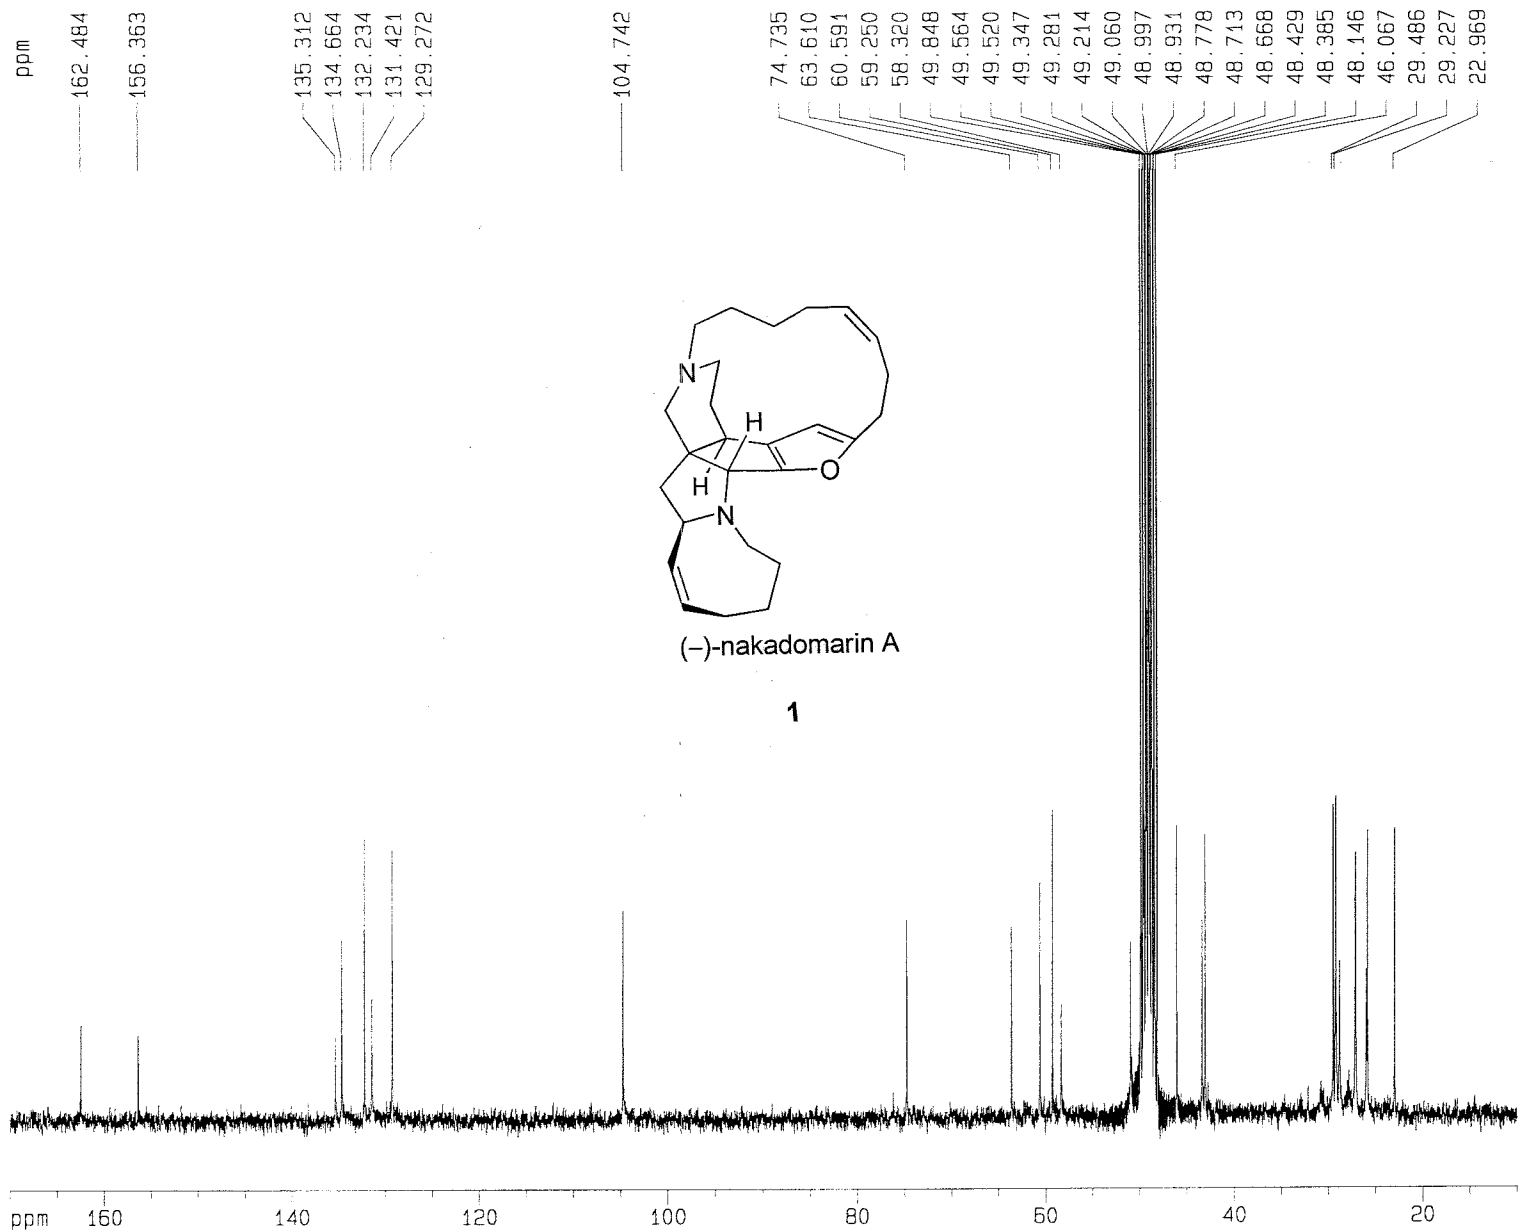

Current Data Parameters  
 NAME 100108mgn  
 EXPNO 140313  
 PROCNO 1

F2 - Acquisition Parameters  
 Date\_ 20081002  
 Time 11.09  
 INSTRUM spect  
 PROBHD 5 mm Multinu  
 PULPROG zgpg30  
 TD 24576  
 SOLVENT MeOH  
 NS 24000  
 DS 4  
 SWH 18832.393 Hz  
 FIDRES 0.766292 Hz  
 AQ 0.6525428 sec  
 RG 16384  
 DW 26.550 usec  
 DE 6.00 usec  
 TE 300.0 K  
 D1 2.0000000 sec  
 d11 0.0300000 sec  
 d12 0.0000200 sec

===== CHANNEL f1 =====  
 NUC1 13C  
 P1 11.80 usec  
 PL1 0.00 dB  
 SF01 75.4760200 MHz

===== CHANNEL f2 =====  
 CPDPRG2 waltz16  
 NUC2 1H  
 PCPD2 110.00 usec  
 PL2 0.00 dB  
 PL12 17.50 dB  
 PL13 17.50 dB  
 SF02 300.1312005 MHz

F2 - Processing parameters  
 SI 32768  
 SF 75.4676427 MHz  
 WDW EM  
 SSB 0  
 LB 1.00 Hz  
 GB 0  
 PC 1.40

1D NMR plot parameters  
 CX 20.00 cm  
 F1P 170.000 ppm  
 F1 12829.50 Hz  
 F2P 10.000 ppm  
 F2 754.68 Hz  
 PPMCM 8.00000 ppm/cm  
 HZCM 803.74115 Hz/cm

Nishida <sup>1</sup>H-NMR CD<sub>3</sub>OD (600 MHz) spectrum of (+)-nakadomarin A (*J. Am. Chem. Soc.* **2003**, *125*, 7484)

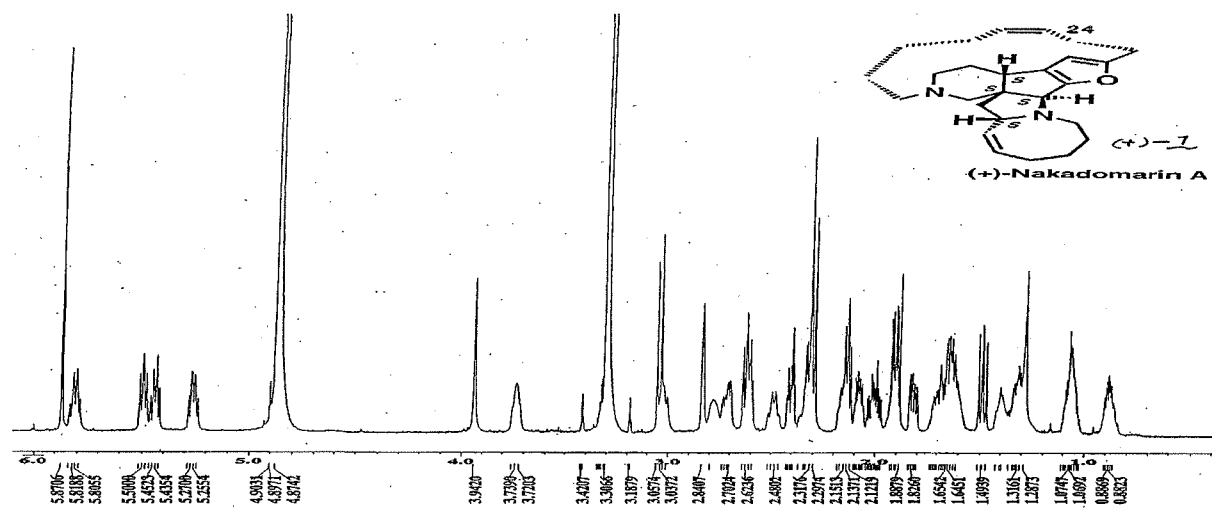

Funk <sup>1</sup>H-NMR CD<sub>3</sub>OD (600 MHz) spectrum of (-)-nakadomarin A

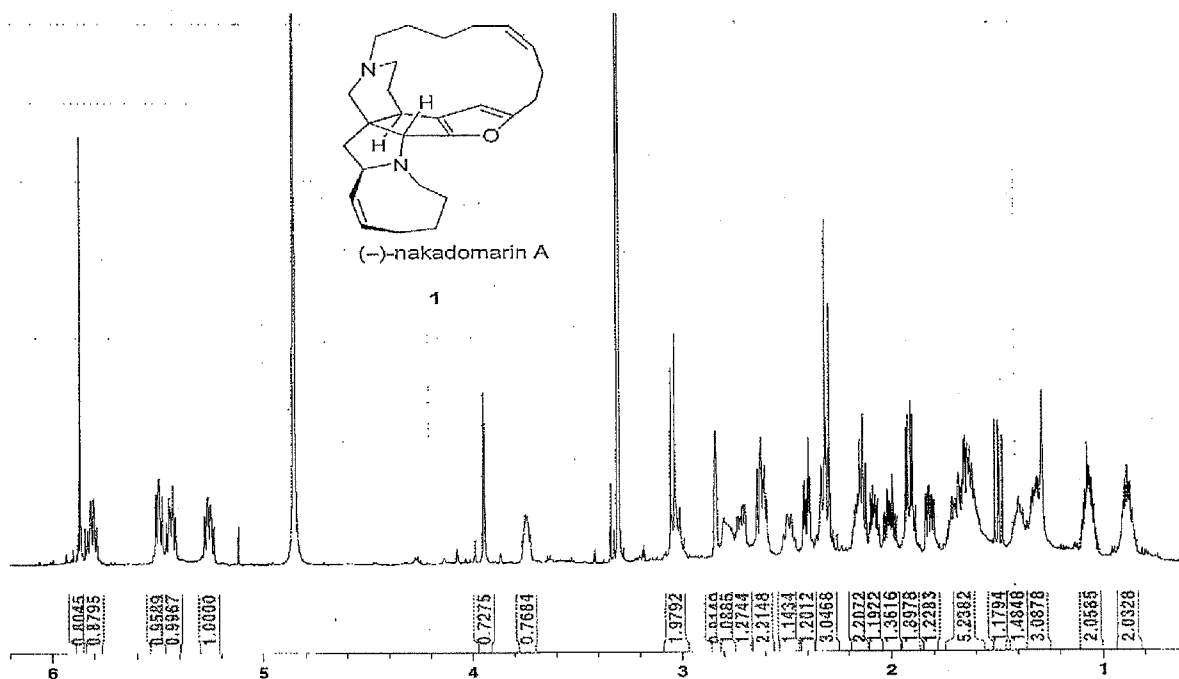

Kerr  $^1\text{H-NMR}$   $\text{CD}_3\text{OD}$  (600 MHz) spectrum of (+)-nakadomarin A (*J. Am. Chem. Soc.*, **2007**, *129*, 1465).

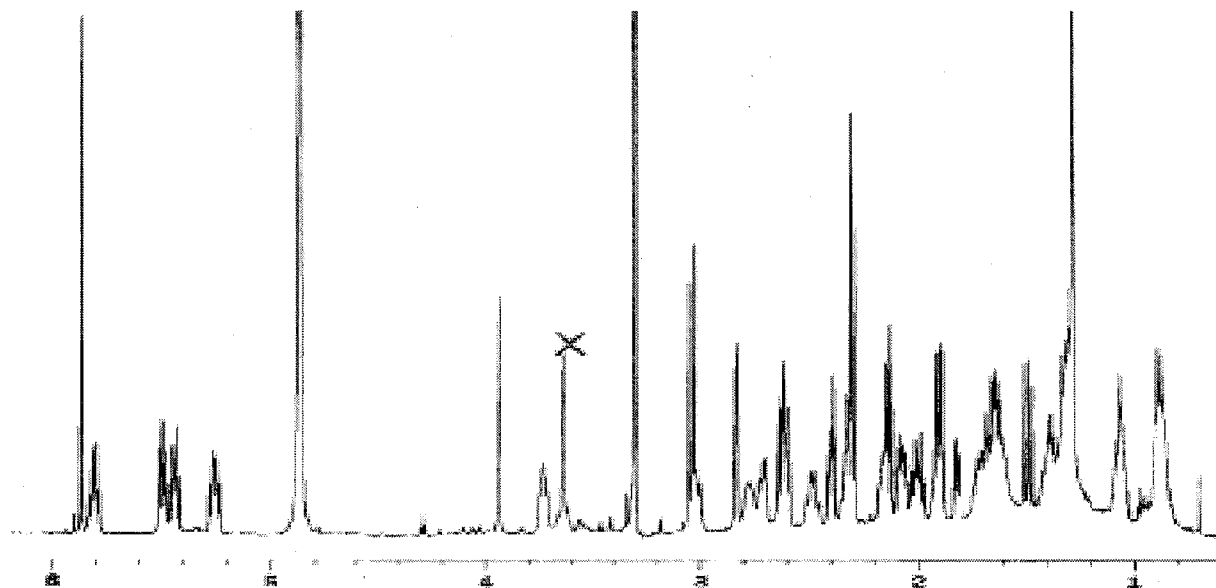

Dixon  $^1\text{H-NMR}$   $\text{CD}_3\text{OD}$  (700 MHz) spectrum of (-)-nakadomarin A (*J. Am. Chem. Soc.*, **2007**, *129*, 1465).

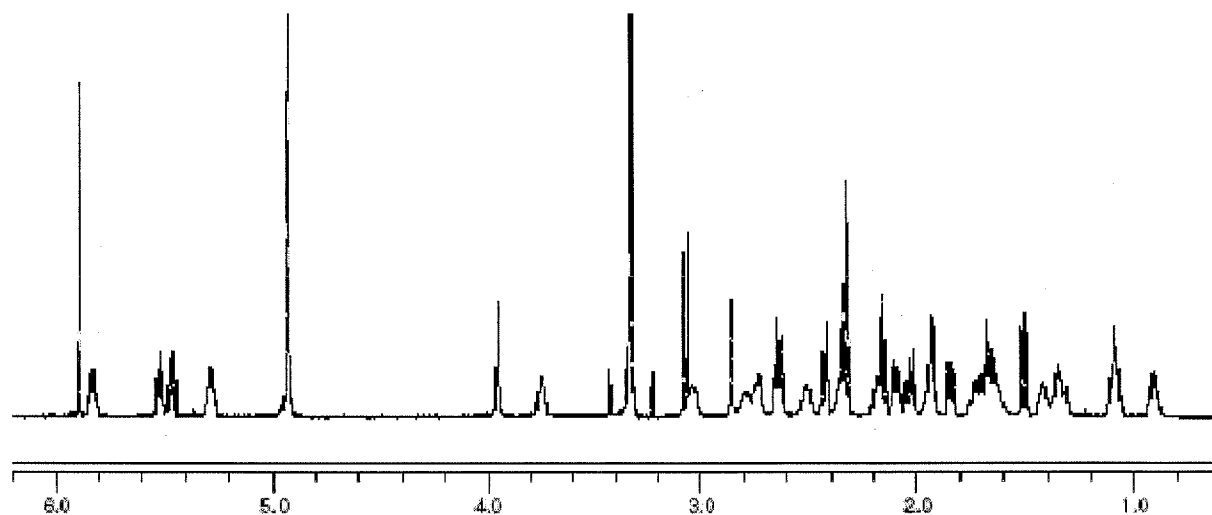

Supplement: NIHMS244120-supplement-3_si_003.pdf [file NIHMS244120-supplement-3_si_003.pdf]
